# 1 Perisomatic Features Enable Efficient and Dataset Wide 2 Cell-Type Classifications Across Large-Scale Electron 3 Microscopy Volumes

4 Leila Elabbady<sup>1,2</sup>, Sharmishta Seshamani<sup>1</sup>, Shang Mu<sup>3</sup>, Gayathri Mahalingam<sup>1</sup>, Casey Schneider-Mizell<sup>1</sup>,  
5 Agnes L Bodor<sup>1</sup>, J. Alexander Bae<sup>3</sup>, Derrick Brittain<sup>1</sup>, JoAnn Buchanan<sup>1</sup>, Daniel J. Bumbarger<sup>1</sup>, Manuel A.  
6 Castro<sup>3</sup>, Sven Dorkenwald<sup>1,3</sup>, Akhilesh Halageri<sup>3</sup>, Zhen Jia<sup>3</sup>, Chris Jordan<sup>3</sup>, Dan Kapner<sup>1</sup>, Nico Kemnitz<sup>3</sup>, Sam  
7 Kinn<sup>1</sup>, Kisuk Lee<sup>3</sup>, Kai Li<sup>3</sup>, Ran Lu, Thomas Macrina<sup>3</sup>, Eric Mitchell<sup>3</sup>, Shanka Subhra Mondal<sup>3</sup>, Barak  
8 Nehoran<sup>3</sup>, Sergiy Popovych<sup>3</sup>, William Silversmith<sup>3</sup>, Marc Takeno<sup>1</sup>, Russel Torres<sup>1</sup>, Nicholas L Turner<sup>3</sup>, William  
9 Wong<sup>3</sup>, Jingpeng Wu<sup>3</sup>, Wenjing Yin<sup>1</sup>, Szi-chieh Yu<sup>3</sup>, The MICrONS Consortium<sup>1,3,4</sup>, H. Sebastian Seung<sup>3</sup>, R.  
10 Clay Reid<sup>1</sup>, Nuno Maçarico Da Costa<sup>1</sup>, Forrest Collman<sup>1\*</sup>

11  
12 1 Allen Institute for Brain Science, Seattle, WA

13 2 University of Washington, Seattle, WA

14 3 Princeton Neuroscience Institute, Princeton University, NJ

15 4 Department of Neuroscience, Baylor College of Medicine, Houston, TX

16

17 **Mammalian neocortex contains a highly diverse set of cell types. These types have been mapped**  
18 **systematically using a variety of molecular, electrophysiological and morphological approaches. Each**  
19 **modality offers new perspectives on the variation of biological processes underlying cell type**  
20 **specialization. Cellular scale electron microscopy (EM) provides dense ultrastructural examination and**  
21 **an unbiased perspective into the subcellular organization of brain cells, including their synaptic**  
22 **connectivity and nanometer scale morphology. It also presents a clear challenge for analysis to identify**  
23 **cell-types in data that contains tens of thousands of neurons, most of which have incomplete**  
24 **reconstructions. To address this challenge, we present the first systematic survey of the somatic region**  
25 **of all cells within a cubic millimeter of cortex using quantitative features obtained from EM. This analysis**  
26 **demonstrates a surprising sufficiency of the perisomatic region to identify cell-types, including types**  
27 **defined primarily based on their connectivity patterns. We then describe how this classification facilitates**  
28 **cell type specific connectivity characterization and locating cells with rare connectivity patterns in the**  
29 **dataset.**

## 30 Introduction

31 Electron microscopy volumes provide a unique perspective on neural circuits by enabling dense tracing of  
32 individual axons, dendrites and synaptic connections. Progress in recent years in data acquisition and dense  
33 segmentation have dramatically grown the capability to acquire large scale datasets.<sup>1-7</sup> The size of these  
34 volumes allow for large numbers of cells to be analyzed and reconstructions of entire dendrites and local axons  
35 of mammalian neurons are now possible. However, it raises the challenge of accurately classifying tens or  
36 hundreds of thousands of cells. Doing so is necessary for many basic investigations, from co-registering  
37 neurons, to studying specific cell populations (including neuronal and non-neuronal cells), or being able to  
38 characterize the cell type specificity of connectivity at scale. Existing methods for automated cell-typing based  
39 on morphology often necessitate nearly complete axonal or dendritic reconstructions.<sup>8-11</sup> Such reconstructions  
40 currently require manual correction to the segmentation, often referred to as proofreading, which is  
41 prohibitively time consuming at scale. Other definitions of cell-types require an understanding of the  
42 connectivity profile of individual axons, and therefore also require axonal proofreading. For example, a  
43 chandelier cell or basket cell is defined most clearly by the way they distribute their synapses onto its target

44 neurons.<sup>12-15</sup>

45

46 In practice, when analyzing a large scale electron microscopy volume, one wants to intelligently invest  
47 proofreading efforts into the cells and cell types that are of interest to one's study. Just as experimental systems  
48 require genetic tools to provide inexpensive access to rare cell populations that would otherwise be difficult to  
49 study with non-selective techniques, large scale electron microscopy requires computational tools to provide  
50 inexpensive access to specific cell types to facilitate further analyses. While the automated segmentation is very  
51 impressive in many respects, a significant amount of proofreading is required to clean and complete the  
52 reconstructions of cells. This means classifying, or even finding, cells based on specific output connectivity  
53 profiles is difficult in the dataset. Moreover, after proofreading, a single neuron reconstruction contains  
54 thousands of accurate synaptic targets to identify (Figure 1). A method that could identify cell-types in the  
55 dataset in a way that is insensitive to changes in proofreading and truncation is therefore of high utility, both to  
56 automate the classification of targets of proofread neurons and to help guide proofreading to cells that are more  
57 likely to have connectivity patterns of interest.

58

59 Here we describe a fast, scalable and computationally inexpensive approach which can address these problems.  
60 We first analyzed the somatic region of nearly 100,000 cells in the MICrONS dataset,<sup>3</sup> a cellular compartment  
61 which contains morphological and connectivity based biological properties that, as we will present, differentiate  
62 cell-types. By analyzing only the somatic region of a cell, our analysis was generally robust to segmentation  
63 errors, unique per cell, and therefore insensitive to most proofreading changes. We included well-established  
64 features that are known to differentiate cells, such as somatic size and cortical depth, as well as novel features  
65 whose cell-type distinctions are less well recognized such as nuclear folding and soma synapse density. We  
66 further developed an unsupervised approach to describe the fine scale morphology of the perisomatic region of  
67 inhibitory cells, and demonstrate that it varies across major inhibitory subclasses. With these features in hand,  
68 we address the need for dataset wide cell-type labels outlined above, by training a hierarchical classifier to  
69 identify basic cell classes across the entire dataset. We demonstrate the utility of perisomatic features to  
70 facilitate the targeted search for rare cell types across a dataset. This method is already being used to reveal  
71 fundamental aspects of cell type specific wiring of mammalian cortex.<sup>3,16-18</sup> More broadly, the efficacy of this  
72 approach provides a roadmap for how to develop a scalable platform for leveraging local features of cells to  
73 infer cell-type classifications across large scale image data.

## 74 Results

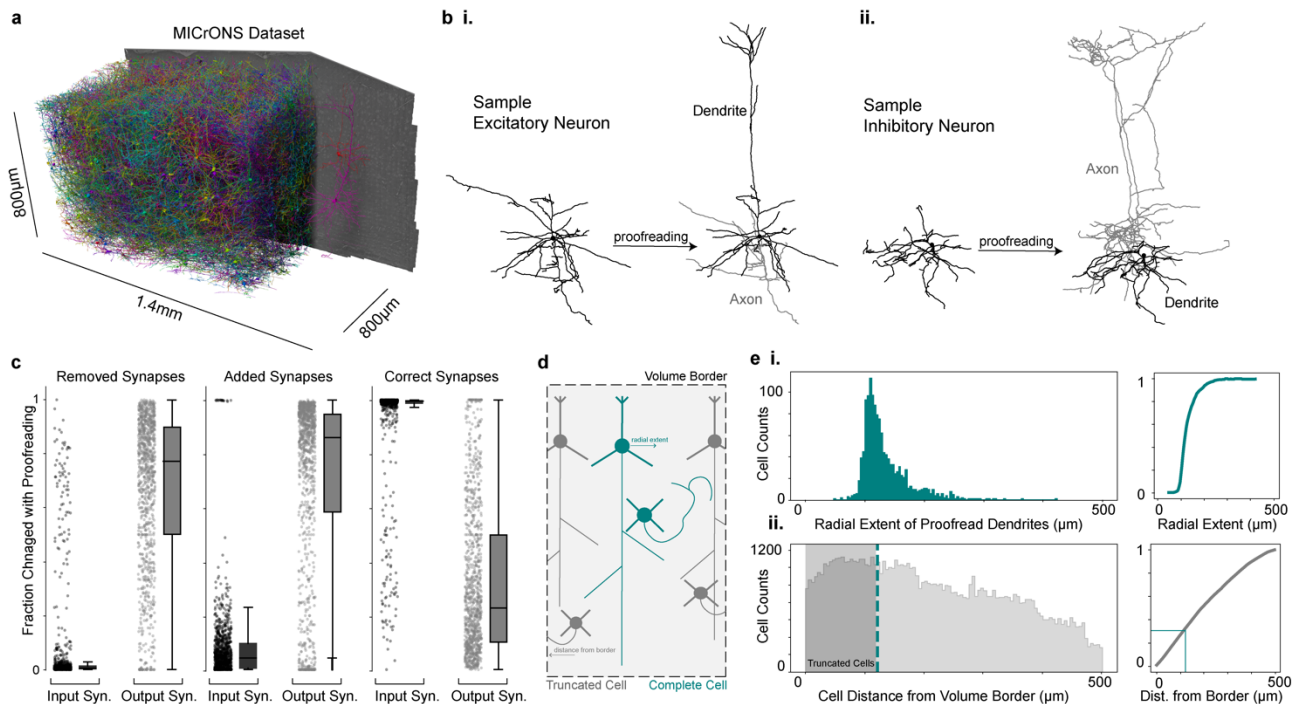

75  
 76 **Figure 1: Large scale automated segmentations necessitate proofreading insensitive cell classifications.** a) Rendering  
 77 of a small fraction of neurons from the MICrONS dataset (1.4mm x 800µm x 800µm) covering all layers of cortex and  
 78 multiple visual areas, with 1,207 rendered and then cutaway to reveal the full morphology of 2 selected neurons on the  
 79 right portion of the dataset. b) Example neuronal morphologies before and after proofreading, i) excitatory neuron and ii)  
 80 inhibitory neuron. c) Fraction of input and output synapses removed (left), added (middle) and maintained (right)  
 81 after proofreading for 1,347 neurons. d) Neurons near the volume borders will inherently have truncated morphologies. e) i)  
 82 Histogram of the radial extent of dendrites from a sample of 1,347 proofread neurons<sup>16</sup> (left) and the cumulative  
 83 distribution of those cells (right). ii) Histogram of the minimum distance from a volume border for all high quality nuclear  
 84 detections (n=94,010) (left) and the cumulative distribution of those distances (right). The portion of cells which are less  
 85 than the median radial extent (33% of cells) is indicated with teal shading and teal lines.

## 86 Segmentation Quality Varies Across Neuronal Arbors

87 We analyzed the larger portion of the MICrONS dataset, a 1.4mm x 800µm x 800µm volumetric serial section  
 88 EM dataset from mouse visual cortex,<sup>3</sup> that contains a dense segmentation of cells along with a nucleus  
 89 segmentation and large scale synapse detection (Fig. 1a).<sup>2,19</sup> This dataset includes 94,010 high quality nuclear  
 90 detections fully enclosed within the boundaries of the volume (see methods) and spans cortical Layer 1 through  
 91 to the white matter. For most cells, high quality cellular segmentation requires proofreading to clean and  
 92 complete the reconstructions, particularly axons (Fig. 1b-c). Most false mergers are of axonal fragments,  
 93 leading most outputs of unproofread axons to be incorrect (Fig. 1c). When axonal proofreading is invested in  
 94 an individual cell, it creates an elaborate object to analyze with thousands of postsynaptic targets. In order to  
 95 analyze the cell-type specific connectivity pattern of that single reconstructed cell (examples in Fig. 5-6), each  
 96 of those post-synaptic cells requires a cell type label. Dendrites on the other hand are quite precise, as 75-95%  
 97 of the 1,000 to 15,000 synapses detected on reconstructed axons can be mapped to their soma in the MICrONS  
 98 dataset with more than 99% accuracy (Fig. 1c). However, many of these targets have incomplete reconstructions  
 99 themselves because even for mm<sup>3</sup> scale volumes about a third the cells are close enough to the edge to have  
 100 their dendrites be truncated (Fig. 1d-e). This level of truncation across cells, whether due to segmentation errors  
 101 or proximity to the volume border, led us to investigate alternative methods for cell-typing that would be  
 102 insensitive to a cell's dendritic and axonal reconstruction status.

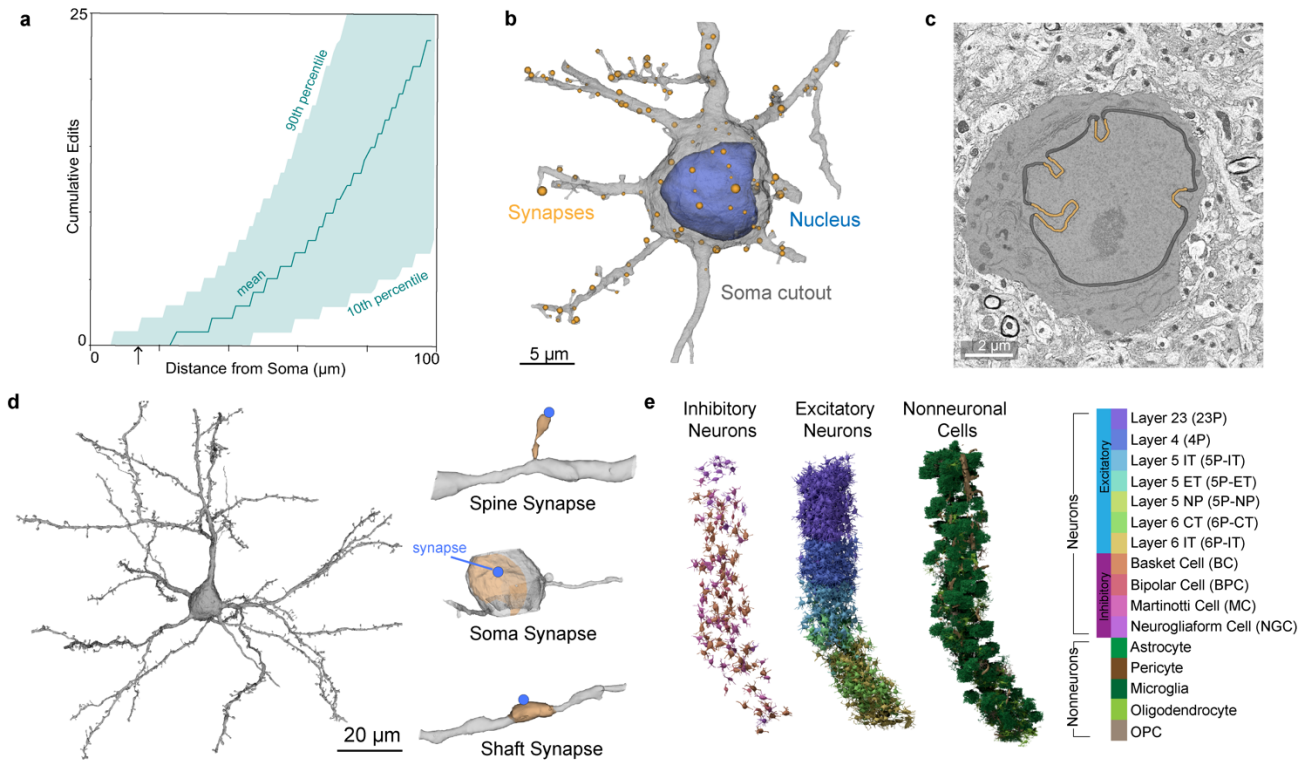

103

104

105

106

107

108

109

110

111

112

113

114

**Figure 2: Perisomatic region of cortical cells.** **a)** A measure of the distance from the soma for each edit that was made to the segmentation during proofreading of 1,347 cells. Average noted by the teal line, area chart notes the 10th and 90th percentile across all cells. Arrow notes 15 microns. **b)** Example cell demonstrating the extent of mesh information used to extract somatic, nuclear and synapse features. All cell meshes were restricted to 15 microns from the center of the nucleus. **c)** Representative example of nuclear infolding in a single electron microscopy image. The soma is highlighted in gray, black represents the nuclear envelope and orange are the areas classified as infolded based on the shrink wrap method (see Methods). **d)** Example cell demonstrating the extent of mesh information used to extract post-synaptic features (left) and three example post-synaptic shapes (PSS)(right). All synapses included in the PSS analyses were within 60 microns from the center of the nucleus. **e)** A 3D rendering of the somatic cutouts from all the cells from a 100 micron column that was densely reconstructed for which manual labels were given. Cells rendered are organized by their cell class and colored by their cell subclass according to the color scheme displayed.

115

## Perisomatic Features Vary Across Cortical Cell Classes and Subclasses

116

117

118

119

120

121

The somatic region of the cell is an attractive location for such a method to focus on because it is a unique region per cell and its limited spatial extent means it is rarely truncated. The automated reconstruction of the somatic region is typically precise and complete, with few changes during proofreading, if any (Fig. 2a). Moreover, the soma also has unique biological processes occurring within it, which led us to investigate if information within the perisomatic region could enable cell classification.

122

123

124

125

126

127

128

129

130

We began by systematically extracting geometric properties of the nucleus and soma within 15 microns from the center of the nucleus (Fig. 2b). For nuclei, this included volume, surface area, and depth from the pial surface. The 3d nuclear segmentations provide a detailed view of an interesting feature of neuronal nuclei, their tendency to form infoldings of their membranes, sometimes also referred to as invaginations. We quantified the fraction of nucleus membrane area that was within an infolding using a geometrical method that shrink wraps the nucleus and labels membrane at least 150 nm from that wrap as part of an infolding (Fig. 2c) (see methods). The nucleus of different cell types has been described as having different degrees of infolding,<sup>20,21</sup> but a systematic quantification has not been done across cortical types. We also calculated similar geometric properties of the somatic region of cells (see methods): the total volume, surface area, the ratio of the nucleus

131 volume to the soma volume, and the distance from the centroid of the nucleus to the centroid of the soma. To  
 132 capture information about neuronal connectivity, we also measured the number and surface density of synaptic  
 133 inputs detected on the somatic region of the cell. Together these somatic and nucleus features represent a feature  
 134 space that was extracted for most cells (75% of nuclei detections, see Methods). For a subset of neurons, we  
 135 also analyzed the nano-scale structure of the postsynaptic compartments, what we are terming a “post synaptic  
 136 shape” (PSS) (see methods) within 60 $\mu$ m of the nucleus center (Fig. 2d).

137

138 In order to develop a dataset wide cell-type classifier, we used a densely reconstructed and manually annotated  
 139 column of 1,619 cells across all layers of primary visual cortex (Fig. 2e).<sup>3,16</sup> This column included excitatory  
 140 neurons (1,115), inhibitory neurons (143), and non-neurons (361) with expert annotated labels for cellular  
 141 classes and neuronal subclasses (Excitatory: Layer 2/3, Layer 4, Layer 5 inter-telencephalic (IT), near-  
 142 projecting (NP) and extra-telencephalic (ET), Layer 6 IT (IT) and corticothalamic (CT) and Inhibitory:  
 143 Martinotti/non-Martinotti cell (MC), Basket cell (BC), Bi-polar cell (BPC) and neurogliaform cell (NGC), Non-  
 144 neurons: astrocyte, oligodendrocyte precursor cell (OPC), oligodendrocyte, microglia, pericyte) (Fig. 2e). The  
 145 cells in this column served as the ground truth throughout the rest of our analyses (see Methods). Though, it  
 146 should be noted that our approach easily incorporates alternative labels as cell-type definitions evolve.

147

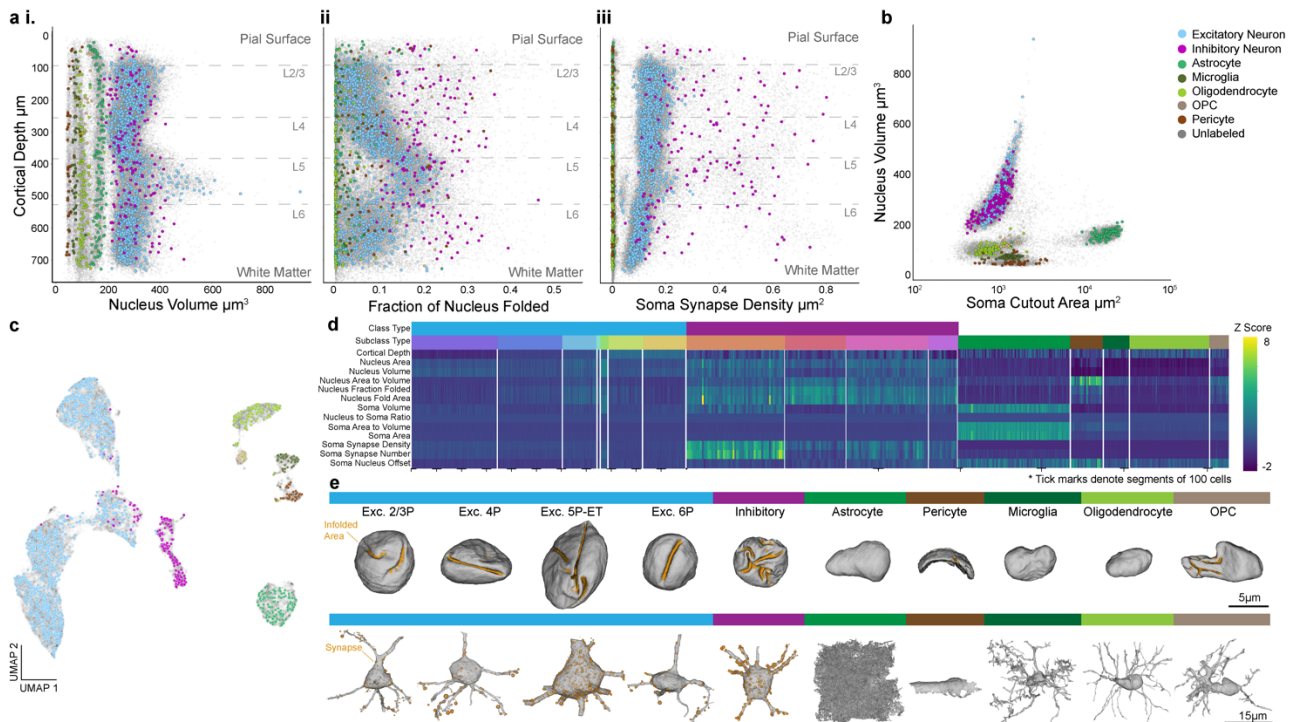

148

149 **Figure 3: Variations of nucleus and somatic features show stark laminar and cell-class based distinctions. a) i)**  
 150 Nucleus volume  $\mu\text{m}^3$  ii) fraction of nuclear membrane infolded and iii) somatic synapse density  $\mu\text{m}^2$  plotted against  
 151 distance from the pial surface in microns. Cortical layer boundaries are noted by the dashed lines. b) Somatic surface  
 152 cutout area in  $\mu\text{m}^2$  (within 15 $\mu$ m from the nuclear center) plotted against nucleus volume  $\mu\text{m}^3$ . c) 2D UMAP embedding  
 153 of all neuronal and nonneuronal cells inferred from somatic features, nuclear features and cortical depth. d) Z-  
 154 scored feature matrix representing all the somatic and nuclear features on the manually labeled cells from the cortical column.  
 155 Cells are organized by their annotated subclass. Dashed marks along the x axis denote segments of 100 cells (1115  
 156 excitatory neurons, 143 inhibitory neurons, 361 nonneurons). For all plots, manually labeled cell classes are represented  
 157 in color (1,619) and unlabeled examples in light gray (n=92,391). e) 3D mesh renderings of representative examples of  
 158 different neuronal and non-neuronal cell classes. In the top row, nuclei displayed with the folded surface area highlighted  
 159 in orange. Corresponding cell bodies displayed in the bottom row with somatic synapses in orange. Sphere size corresponds  
 160 to predicted synapse size from the synapse detection model.<sup>3</sup>

161

162 How effective are different features alone in separating cells at different levels of classification within the  
163 cortex? To answer this question we plotted various individual features, and trained classifiers to distinguish  
164 cells at different levels of granularity. Nucleus features alone were nearly sufficient to separate neurons from  
165 non-neuronal cells (cross-validated classification accuracy 90%, Extended Data Table 1). Non-neuronal cells  
166 had generally smaller nuclei compared to neuronal cells, though astrocytes overlap in this distribution with the  
167 smallest neurons. Each non-neuronal cell class exhibited a distinct range and consistency in their nucleus  
168 volume across the layers of cortex (Fig. 3a.i). A nucleus-only classifier was able to identify non-neuronal  
169 subclasses with a cross-validated accuracy of 94% (Extended Data Table 1). Nucleus features of excitatory  
170 neurons across the dataset recapitulated expected laminar organization, wherein the borders between layer 2/3  
171 (L23), layer 4 (L4), layer 5 (L5), and layer 6 (L6) are all demarcated by shifts in the distribution of nucleus  
172 volumes. (Fig. 3a.i). Inhibitory cells, on the other hand, had less striking laminar patterns, but with more overall  
173 variation. They had a wider variation of nucleus volumes, which overlapped with those of excitatory cells, with  
174 the exception of the larger layer 5 excitatory neurons (Extended Data Fig. 1).

175  
176 The fraction of membrane inside an infolding also varied widely and systematically depending on depth (Fig.  
177 3a.ii, 3e). Layer 2/3 neurons had largely smooth nuclear membranes. There was a clear gradient of infolding  
178 within layer 4. All layer 5 excitatory cells had high degrees of infolding, despite the notable diversity of cell  
179 types and sizes within that population, which was reflected in the increased variation of nucleus volume in that  
180 layer.<sup>22</sup> Infolding dropped sharply again in layer 6 (Fig. 3a.ii). On the other hand, inhibitory nuclei had 15-30%  
181 of their membrane within an infolding, regardless of their position within cortex. This made them quite distinct  
182 from excitatory neurons in layer 1, 2/3, 4 and 6 of cortex, but highly similar to those in layer 5 (Fig. 3a.ii,  
183 Extended Data Fig. 1). Non-neuronal cells generally did not have infoldings, though microglia, OPCs and  
184 oligodendrocytes had less spherical and convex shapes (Fig. 3e). Pericytes had the smallest overall volumes  
185 with shapes dominated by their close apposition to the vascular walls (Fig. 3e).

186  
187 Two features alone, nucleus volume and soma cutout area, revealed a surprisingly striking separation between  
188 the major cell classes found in the brain (Fig. 3b). In particular, neurons were separated from all non-neuronal  
189 classes and microglia, oligodendrocytes, OPCs, astrocytes, and pericytes occupy largely distinct portions of this  
190 2-dimensional space. The large surface area measurement for astrocytes was explained by the high density of  
191 their processes near the soma. Moreover, the high prevalence of segmentation mergers of pericytes with cortical  
192 vasculature resulted in variability in their soma size features as represented by the range in soma cutout area  
193 (Fig. 3b). Including the somatic features along with the nucleus features, we trained a classifier to distinguish  
194 neurons, non-neurons and erroneously segmentations from each other with a cross validated accuracy of 95.6%,  
195 and a classifier on non-neuronal classes with 97.5% accuracy (Extended Data Table 1).

196  
197 Excitatory neurons showed a consistent synapse density that varied slightly in a linear fashion with depth  
198 through the cortical volume. There was a notable increase in variation in layer 5 that correlated with the three  
199 subclasses found there with ET cells having larger synapse densities, NP cells with low synapse densities and  
200 IT cells in between (Fig. 3a.iii., 3e). Inhibitory neurons exhibited less laminar variation in somatic size.  
201 Inhibitory cells had much larger density of somatic innervation than excitatory cells, but also have a much wider  
202 degree of variation, reflecting previously recorded diversity of inhibitory subclasses (Fig. 3a.iii, 3e).<sup>19,23-26</sup>  
203 Unsurprisingly, all nonneuronal cells have many fewer somatic synapse counts and thus are clearly distinct  
204 from neurons across laminar layers (Fig. 3a.iii). Classifier accuracy for excitatory subclasses was high (90%  
205 Extended Data Table 1), with most confusion surrounding IT cells located at laminar borders, general locations  
206 expert annotators can reasonably disagree. Notably, accuracy was high across the layer 5 cell types (99% for  
207 NP, 85% for IT, and 87% for ET).

208

209 To gain a broader understanding of the perisomatic feature landscape, we computed a low-dimensional  
 210 embedding based on both nucleus and somatic features (Fig. 3c). Consistent with the diversity observed in  
 211 individual features, low dimensional embeddings of the feature space across all the cells in the dataset (gray,  $n$   
 212 = 92,391) reflected the variations observed from the manually labeled cortical column (cell class colors,  $n$   
 213 = 1,619). Non-neuronal cell classes occupied distinct areas of the feature space whereas excitatory neurons were  
 214 primarily organized by cortical layers (Extended Data Fig. 1). Inhibitory neurons were largely restricted to a  
 215 distinct cluster within this space, with some cells overlapping with cortical layer 5 cells likely due to the increase  
 216 in nuclear infolding in those excitatory neurons. Although there were broad average differences in the nucleus  
 217 and somatic features between the major interneuron subclasses (Fig. 3d), our attempts at building classifiers  
 218 based on those features produced some confusion (accuracy of 90%) (Extended Data Table 1).

## 219 Proximal Dendrites of Inhibitory Neurons Vary in Distributions of Post-Synaptic 220 Morphologies

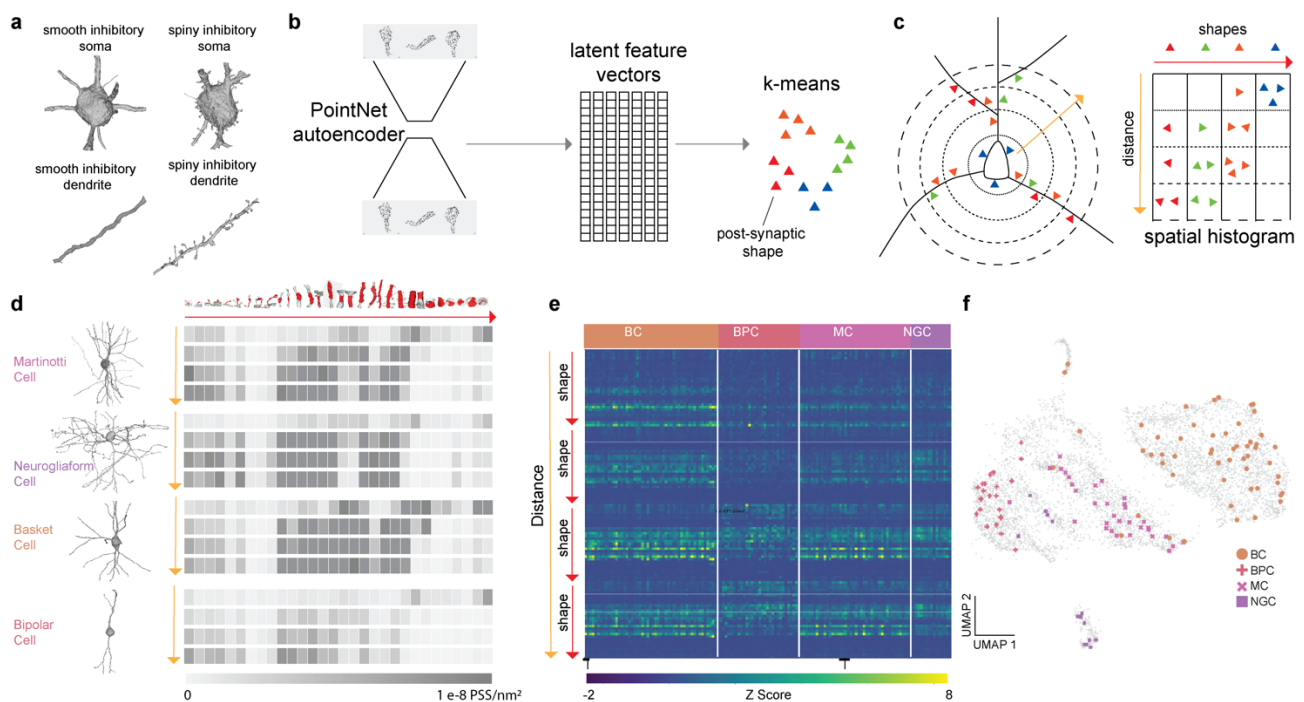

221  
 222 **Figure 4: Post Synaptic Shape (PSS) Features.** **a)** Inhibitory neurons elicit large variability in ultrastructural  
 223 morphology. **b)** Procedure for building a PSS dictionary model. The set of shapes is used to train a PointNet autoencoder  
 224 which learns a latent feature vector of a fixed size (1024). This autoencoder is then applied to all shapes in the dictionary  
 225 to generate a set of latent feature vectors. K-means with  $K = 30$  is applied to this to obtain a set of cluster centers for  
 226 binning the shapes. **c)** For each cell, the PSS are binned by shape type and distance from the soma (4 bins) from 0 - 60  
 227 microns with 15 micron bin sizes. The resulting histogram is a 2D histogram shown above with the shapes in the x direction  
 228 and distances in the y direction. **d)** Examples of 60 micron cutouts of the 4 predicted inhibitory subclasses with their spatial  
 229 histograms shown as heatmaps. The top row shows the shape of the cluster center of each of the 30 clusters. In each heat  
 230 map, darker boxes indicate higher values. **e)** Z-scored feature matrix representing the distance binned PSS features on the  
 231 manually labeled inhibitory cells from the cortical column ( $n=143$ ). Cells are organized by their annotated subclass. Dashed  
 232 marks along the x axis denote segments of 100 cells **f)** 2D UMAP of all the inhibitory neurons ( $n=6,805$ ) inferred after  
 233 concatenating nucleus, soma and PSS features, cortical column cells in color and dataset wide inhibitory neurons in gray.

234  
 235 At the same time, it was clear that the ultrastructure of inhibitory neuron peri-somatic regions was diverse in  
 236 ways that the soma and nucleus features did not capture. Upon inspection, proximal inhibitory branches varied  
 237 in caliber and surface texture, from smooth and uniform to covered in small spine-like protrusions (Fig. 4a). In  
 238 order to take advantage of this information, we developed a method to summarize these fine shape statistics of

239 the proximal arbor.<sup>27</sup> Since automated spine detection is a challenging technical problem, we instead use  
240 automated synapse detections to identify areas on the dendrites where changes in fine structure (e.g. spines)  
241 may occur. This approach gave us the added advantage of combining information about synaptic innervation  
242 with the fine morphological structure of the postsynaptic neuron surrounding any given synapse.

243

244 For this, we computationally segmented the compartment on the postsynaptic side of each synapse, which we  
245 refer to as the “Post-Synaptic Shape” (PSS).<sup>27</sup> This shape, computed as a variable sized mesh, typically  
246 represented either a portion of the soma, the shaft of a dendrite, or a spiny protrusion, though it could also be  
247 onto an axon or axon-initial segment. In order to model the diversity of these shapes, we needed to be able to  
248 compare these shapes with each other computationally. We therefore trained a PointNet auto-encoder that  
249 allowed us to generate a fixed size representation of each shape (Fig. 4b) of dimensionality 1024.

250

251 We also wanted to measure the density of the distribution of shapes present in a cell. Consequently, we collected  
252 236,000 PSSs from a variety of neurons and applied a 2D dimensional reduction in order to visualize their  
253 distribution. This resulted in a continuous latent space where PSS objects of similar morphological character  
254 were closer together (Extended Data Fig. 2). Since different cells can have different numbers of shapes  
255 (synapses), we now needed to develop a fixed size representation for a cell. For this, we used the similarity  
256 observation from the 2D latent space to develop a binning protocol for all the shapes. We used the full 1024  
257 dimension features from the 236,000 PSSs and computed 30 cluster centers with K-means (Fig. 4b). Binning a  
258 set of shapes extracted on a cell using these cluster centers would therefore give us a 30 dimensional histogram.  
259 (The K-means algorithm randomly assigns the order of discretizations. Therefore, we also manually re-ordered  
260 the bin centers for visualization purposes from shapes representing small spines, to those representing longer  
261 spines, to dendritic shafts of different shapes, and finally somatic compartments.)

262

263 We also observed that the location of the PSS could give us extra cues to distinguish between cells. For example,  
264 while spiny protrusions were most often found on the dendrites of cells, some cells also had them on the soma  
265 (Fig. 4a, Extended Data Fig. 3). Therefore, we took a second step of summarizing a cell’s distribution of PSSs  
266 according to its shape and distance from the nucleus center. For distance binning we used four 15 micron bins  
267 between 0 to 60 microns from the soma (see Methods). Combining the shape and distance binning resulted in  
268 a 120 dimensional spatial shape histogram (Fig. 4c), that summarizes information about the spatial organization  
269 of dendritic shapes and synapse densities near the soma, similar to a multi-dimensional Sholl analysis.<sup>28</sup> There  
270 were typically clear visual differences in the spatial histograms of different cell types (Fig. 4d-e, Extended Data  
271 Fig. 3). For example, a Martinotti cell had a greater density of synapses onto small protrusions on its proximal  
272 dendrites than the basket or bipolar cell, but similar numbers to the neurogliaform cell. However, the  
273 neurogliaform cell had very few synapses on its soma, whereas the Martinotti has many, both onto smaller  
274 protrusions and smoother compartments of its somatic compartment (Fig. 4d).

275

276 We then extracted these features on the vast majority of putative inhibitory neurons in the dataset (as predicted  
277 by perisomatic features, see methods). Appending these features to the soma features from the previous section  
278 and inspecting the UMAP (Fig. 4f) suggested that several inhibitory types that were not easily distinguishable  
279 without the PSS features were now more separable (subclass accuracy of 94%, Extended Data Table 1).



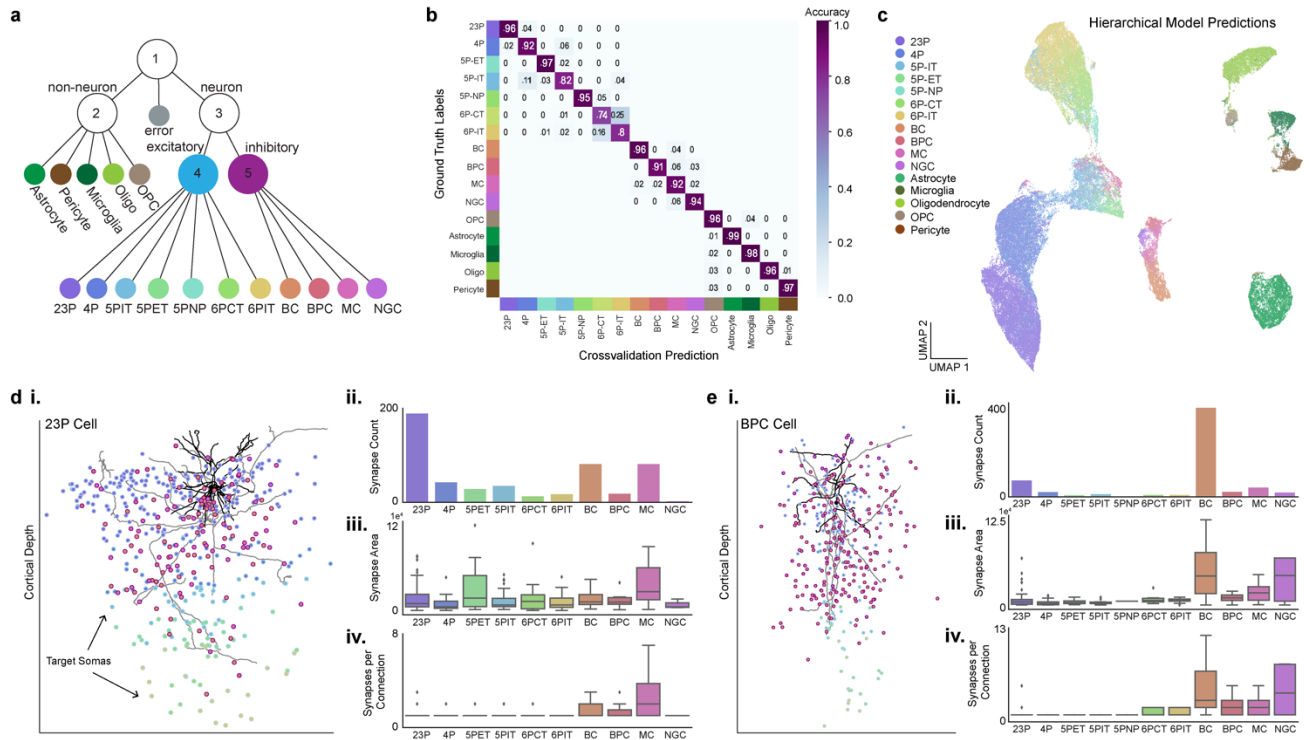

280

281

282

283

284

285

286

287

288

289

290

291

292

293

**Figure 5: Hierarchical predictions enable dataset wide circuit analyses.** **a**) Diagram of the hierarchical model framework used to predict neuronal and nonneuronal subclasses using a set of 5 classifiers. Nucleus and soma features alone were used for models 1-4. PSS features were added to predict inhibitory subclasses in model 5 (Extended Data Table 1). **b**) Confusion matrix of the cross validation performance for all cells within the manually labeled column. Note that classifiers for excitatory neurons, inhibitory neurons, and non-neurons were trained separately (Models 2,4,5 in panel a). The confusion rate between these classes can be seen in Extended Data Fig. 4. **c**) 2D UMAP embedding inferred from depth, nucleus, and soma features of all cells in the dataset colored by the hierarchical model predictions. **d**) **i**) 2D rendering of a representative 23P cell morphology, dendrite in black and axon in gray. Points represent the somatic position of all downstream target cells colored by the hierarchical model subclass prediction. **ii**) synapse count **iii**) total synapse area and **iv**) number of synapses per connection displayed by the model predicted subclasses illustrating the local targeting profile of this individual cell. **e**) Similar information as in d but for an inhibitory bipolar cell that is predicted to preferentially target basket cells. This unique population of bipolar cells has been further characterized in Schneider-Mizell 2023.

## 294 Perisomatic Features Enable Dataset Wide Classification

295

296

297

298

299

300

301

302

303

304

305

306

307

308

In order to support these qualitative observations with quantitative methods and enable dataset wide classification, we trained a collection of classification models (support vector machines or multilayer perceptrons) on different feature sets: 1 - nucleus only, 2 - nucleus and soma, 3 - nucleus, soma and PSS (Extended Data Table 1). All classifiers were trained using the labels from the manually labeled cortical column (see methods for more detail). We developed a hierarchical model that used a cascade of classifiers to sort cells at increasingly finer distinctions and integrated the steps into a comprehensive model where individual cells are sequentially sorted down the hierarchical tree (Fig. 5a). We found an optimal combination of classifiers which predicted cell types labeled within the column with an overall accuracy of 91% (Fig. 5b, Extended Data Table 1), and importantly providing classifications for 88% of the cellular objects in the dataset (94,010/106,761 cells). To further validate this classification, we randomly sampled 100 cells from each subclass predicted by the hierarchical model and had human anatomical experts assess the labels (Extended Data Fig. 4). For many classes, the average classification in this validation was consistent with the accuracy found within the column. The lower validation accuracy in the inhibitory subclasses as well as 5P-ET and 5P-NP was likely related to the sparse sample sizes in the training data from the column. The largest single confusion between types here was

309 between adjacent layers of similar pyramidal classes, where strict laminar boundaries separating manual classes  
 310 is less confident. This demonstrates that these features are indeed useful for separating cell-types based on local  
 311 somatic reconstructions of cortical cells, consistent with the structure of the low dimensional embedding (Fig.  
 312 5c). Furthermore, predictions of cell density and overall cell counts per subclass across the dataset (Extended  
 313 Data Fig. 5) corroborate the sampling rates we would expect from previous studies.<sup>29-32</sup> Importantly, this  
 314 approach can easily be adapted to accommodate new cell-type labels derived from more detailed or expansive  
 315 studies of the dataset, creating a scalable platform for extending labels derived on smaller numbers of cells to  
 316 dataset wide coverage. For example, we have successfully trained models based on the unsupervised clustering  
 317 labels of morphological and connectivity properties of the same column cells as described in Schneider-Mizell  
 318 2023 (Extended Data Fig. 6).

319  
 320 Dataset wide classifications enable a range of subsequent analyses. The typical axon of a well-proofread neuron  
 321 has hundreds or thousands of postsynaptic targets.<sup>3</sup> To quantify the cell-type specific connectivity of such cells,  
 322 each of those targets should have a cell-type label. Doing so manually is a practical bottleneck in analyzing  
 323 these data. With these predictions, scientists can easily analyze the most numerous postsynaptic targets, the  
 324 weight of these synapses with respect to predicted synapse area, and the number of synapses between proofread  
 325 cells and cell subclasses across thousands of synapses (Fig. 5d-e). For example, a given layer 2/3 pyramidal  
 326 neuron made the most synapses onto other 23P neurons (Fig. 5d). However, when we looked at the total  
 327 predicted synapse size, 5P-ET neurons receive some of the largest average synapses. On the other hand, some  
 328 examples were more surprising than this 23P cell. For example, bipolar cells (which largely overlap with a VIP  
 329 subclass) have been described as the only disinhibitory specialist interneuron class, and are described as making  
 330 synapses primarily onto SST cells (which are thought to overlap largely with the Martinotti Cell definition used  
 331 here).<sup>33-36</sup> Although the dataset contains cells consistent with that view, a companion study on extensively  
 332 proofread cells identified a collection of disinhibitory multipolar neurons which exhibit strong targeting  
 333 preferences for basket cells.<sup>16</sup> This unique connectivity profile is observed in the dataset wide classifications as  
 334 well (Fig. 5e).

335

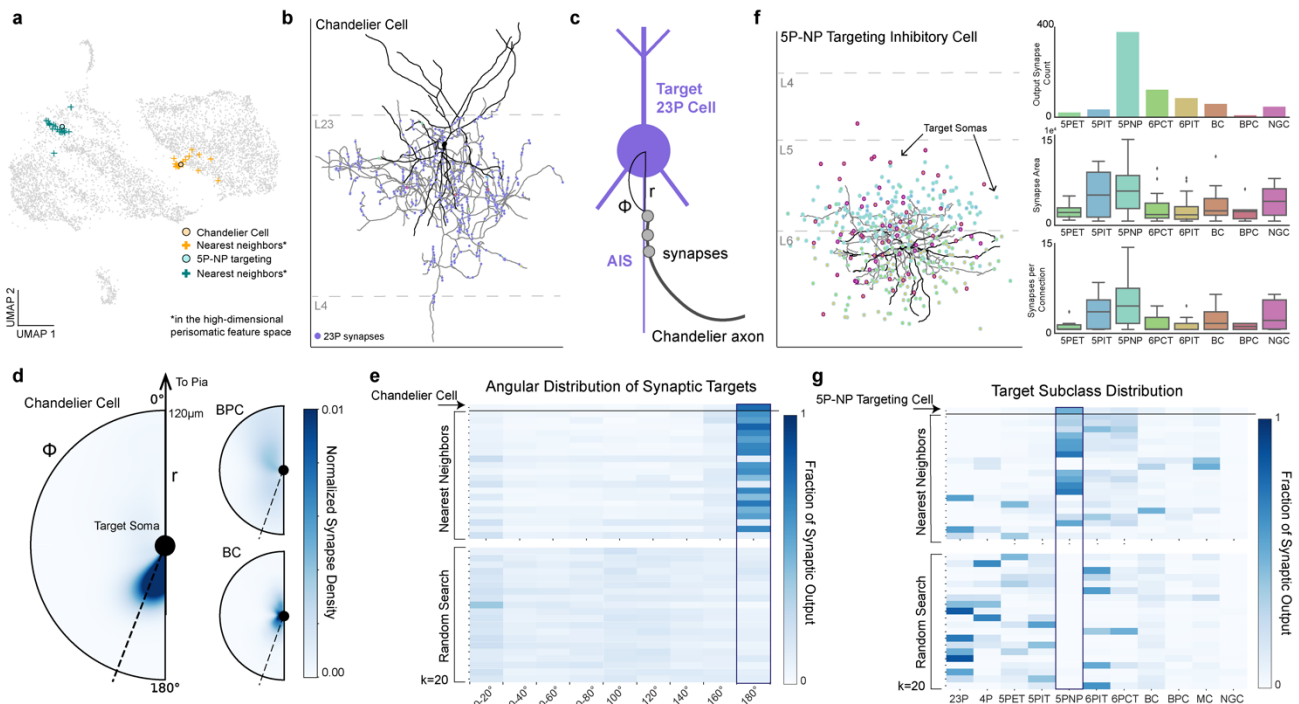

336  
 337 **Figure 6: Perisomatic feature space enables more efficient search for unique cells.** a) 2D UMAP embedding  
 338 highlighting an example chandelier cell (orange dot) and an example 5P-NP targeting cell (blue dot) and their respective

339 20 nearest neighbors (+) in the perisomatic feature space. Note that UMAP non-linearly distorts feature space, so not all  
340 the nearest neighbors appear closest in the plot. **b)** Example proofread chandelier cell in layer 2/3 (dendrite in black, axon  
341 in gray). Output synapses marked along the axon and colored by the subclass prediction. Notice the characteristic vertical  
342 chains of synapses onto 23P cells. **c)** Chandelier cells are characterized by their preference to synapse onto the axon initial  
343 segment (AIS) of target cells.<sup>13,14</sup> This can be quantified by measuring the angle between the target soma and the synapse  
344 ( $\phi$ ) and the distance from the soma ( $r$ ). **d)** Heatmap illustrating the angle and distance distribution of the chandelier cell  
345 shown in B as well as two non Chandelier inhibitory examples. Note the spatial specificity of the chandelier cell targeting  
346 just below the target soma as compared to the other examples. Color notes the normalized synapse density for each cell.  
347 Synapses that had an angle  $>160^\circ$  were considered onto the AIS of the target cell (shown by the dotted line). **e)** Angular  
348 distribution histogram of the chandelier cell (top row), the 20 nearest neighbors in the perisomatic feature space, and 20  
349 random inhibitory cells. **f)** Example cell that preferentially targets the rare 5P-NP subclass (dendrite in black, axon in gray),  
350 points represent target cell soma locations colored by predicted subclass. Output synapse counts reflect strong preference  
351 to 5P-NP cells. **g)** Fraction of output connectivity onto neuronal subclasses of the 5P-NP targeting cell (top row), the 20  
352 nearest neighbors in the perisomatic feature space, and 20 random inhibitory cells.

### 353 Perisomatic Features Enable Efficient Search For Rare Cell Types

354 Studying the connectivity patterns of cell types requires identifying many example cells of a particular  
355 connectivity profile. With more than 70,000 neurons densely sampled across a millimeter scale there should be  
356 many examples of any individual cell type. However, locating those examples can be challenging for rare  
357 subclasses because of their infrequent appearance and the need for axonal proofreading in order to use  
358 connectivity to suggest their subclass.

359  
360 Given that the major inhibitory neuron subclasses differ in their connectivity profiles, we already had some  
361 evidence that connectivity profile correlates with the perisomatic features we extracted (Fig. 4e), but we  
362 conjectured they could be useful for finding rarer types with highly specific connectivity patterns for which we  
363 did not yet have labels. One particularly interesting and well known rare cell type in mouse visual cortex is the  
364 chandelier cell, which exclusively synapses onto the axon initial segment (AIS) of excitatory neurons.<sup>13-15,23,37,38</sup>  
365 We used a single proofread chandelier cell to see if we could facilitate finding other cells like it using the  
366 perisomatic features. We picked the top 20 nearest neighbors of the perisomatic feature space (Fig. 6a) and  
367 assessed what fraction of them were chandelier cells based on their connectivity profiles after cleaning them of  
368 false mergers and modest axonal extension (see methods). The chandelier cell's connectivity profile is easy to  
369 recognize, both from its morphology where it makes vertical strings of synapses (Fig. 6b), and the unique  
370 targeting of synapses onto axon initial segment (AIS) of excitatory neurons. Because the AIS is usually located  
371 just below the soma of excitatory cells in the cortex, the angular distribution of synapses relative to somatic  
372 targets can be used as a spatial proxy for AIS targeting (Fig. 6c-d). A histogram of the angular distribution of  
373 synapses relative to the target soma (Fig. 6d-e), demonstrates that 16 of 20 the nearest neighbor cells have  
374 connectivities consistent with chandelier cells. In contrast, none of the 20 random interneurons we sampled  
375 from the inhibitory neurons in the dataset, or any of the 143 interneurons systematically sampled in the column  
376 were chandelier cells, reflecting a highly significant enrichment ( $p < 0.00001$  by Fisher exact test). Based on this  
377 success, we also tried to find more examples of cells with a less well known connectivity profile. We selected  
378 a classically undescribed but proofread interneuron which made the majority of its synapses in layer 5 onto 5P-  
379 NP neurons, despite those neurons being rare and with few input synapses (Fig. 6f).<sup>39</sup> Picking the top 20 nearest  
380 neighbors of this cell, we found 13 cells which made at least 30% of their synaptic targets onto NP cells (based  
381 on our dataset wide classifier). This stands in contrast to the 0 of 20 random interneurons we sampled, or 2 of  
382 other cells of the other 163 systematically sampled in the column, again a highly significant enrichment  
383 ( $p < 0.00001$ ) (Fig. 6g). This application demonstrates how these features can be used to target rare cell types in  
384 the cortex.

## 385 Discussion

386 Our analysis of the perisomatic region of cells in the mouse visual cortex demonstrates that a surprising amount  
387 of cell-type information can be extracted from the somatic regions of brain cells. Our approach has already been  
388 used to characterize the connectivity of distinct types of layer 5 Martinotti cells,<sup>17</sup> the inter-related connectivity  
389 motifs of layer 5 thick tufted cells (5P-ET) and the surrounding inhibitory sub-network,<sup>18</sup> and to confirm the  
390 connectivity profiles of interneurons to cells outside the column.<sup>16</sup> Future work in this dataset and others will  
391 likely leverage iterations of dataset wide cell classifiers to discover novel aspects of cell-type specific wiring of  
392 cortical circuits along with broader organizational principles of wiring. Other cell classification approaches  
393 have been applied to this dataset, including unsupervised clustering of morphological features, and supervised  
394 approaches based on morphological graphs.<sup>40,41</sup> All these approaches have focused on smaller subsets of the  
395 data that contained higher quality or complete reconstructions, reducing their effective coverage in the datasets  
396 to less than half the cells. In contrast, by leveraging the perisomatic features our hierarchical model covers  
397 almost all cells and the majority of detected synapses in the dataset with a postsynaptic cell type. Furthermore,  
398 extracting these features from the 3D segmentation alone is both fast and computationally inexpensive, making  
399 this framework scalable and iterable across datasets.

400

401 The breadth of cells in large scale electron microscopy data makes it an attractive modality to study cell-types.  
402 Our approach provides an example of how computational methods are an important practical tool for efficiently  
403 directing study to small subsets of cells within large datasets. This is particularly clear within highly diverse  
404 and rare inhibitory cells (as shown in Fig. 5-6), but similar questions arise among glial sub-types. One such  
405 example is the difference between OPCs and premyelinating oligodendrocyte cells which are thought to be  
406 differentiated OPCs that are in transitional states to oligodendrocytes.<sup>42</sup> The structural diversity of cells  
407 predicted as OPCs within the low dimensional embedding space (Fig. 5c) suggests that searching within the  
408 perisomatic feature space, as illustrated in Fig. 6, could be used to facilitate scientific discovery across brain  
409 cell types. More broadly, some of the features described here can be measured with other techniques, such as  
410 x-ray tomography or light microscopy, and can be used to distinguish cells into different subclasses in a manner  
411 similar to what has been presented here.

412

413 Many studies of anatomical diversity of cortical cells have focused on the diversity of dendritic and somatic  
414 morphologies, axonal projection patterns, and synaptic connectivity patterns.<sup>24,43-45</sup> Fewer studies have focused  
415 on differences in the of somas,<sup>46-48</sup> particularly quantitative studies of the 3d ultrastructure of the soma with  
416 large single cell sample sizes across all layers of cortex. Laminar differences in cell body size distributions are  
417 well known, and serve as the basis for cyto-architectural definitions of layers, which clearly correlates with  
418 shifts in cell-type distributions, particularly excitatory ones.<sup>49</sup> For example, pyramidal Layer 5 ET projection  
419 neurons are characterized by their large somas. This likely reflects differing demands for gene expression and  
420 metabolic load.<sup>50</sup> Also, 5P-NP neurons have been recognized before as having smaller rounder somas on  
421 average.<sup>39,51</sup> Further, anecdotal descriptions of variations in nucleus in-folding have been reported, though only  
422 in two dimensions within a narrower range of types (<https://pubmed.ncbi.nlm.nih.gov/3988983/>). Intriguingly,  
423 differences in nucleus infoldings have been reported to be modulated by activity in some brain areas.<sup>52</sup>

424

425 One of the more striking features of our results is both the amount and distribution of perisomatic innervation  
426 varies across cell types. Although this has not been measured directly across a large number of cells and cell-  
427 types in cortex before, our results are consistent with other studies.<sup>19,23</sup> In particular, in excitatory cells, somatic  
428 input has been noted to be dominated by inhibitory sources.<sup>53</sup> Although this is less well characterized for  
429 inhibitory subtypes, some have larger fractions of excitatory input.<sup>54,55</sup> In addition, different types of inhibitory  
430 axons show preference or avoidance of the somatic compartment.<sup>53,54</sup> Because the total somatic synaptic density

431 reflects an aggregate across all pre-synaptic types, such cell-type specific output patterns<sup>54–56</sup> are likely related  
432 to and consistent with the variation we have observed across types in summed inputs.

433

434 There are a few limitations to this work that should be kept in mind when interpreting its results. First, our  
435 most detailed analysis has only been completed on one dataset which comes from a single animal. That said,  
436 some patterns are consistent with what was found in smaller published dataset from layer 2/3,<sup>19,23,57</sup> and the  
437 basic patterns found in these features across mouse visual cortex are reproduced in a second smaller dataset  
438 (Extended Data Fig. 7). Our approach is not the final word in cell-type predictions in this dataset, or large scale  
439 EM in general, and there are a number of dimensions of potential improvement. First, cell-type labels will  
440 continue to evolve as more cells are classified by either human experts or quantitative methods with increasing  
441 specificity and sophistication. In particular, our validation results are consistent with there being a larger  
442 diversity of inhibitory cells than exist within the column and so expanding the number of classes and labels  
443 there could improve performance. However, we think the dataset wide framework we have presented here will  
444 continue to be valuable, as we still expect any new labels to only be available for a small subset of cells. It  
445 should be noted that while the soma and nucleus features are very fast, inexpensive, and scalable, the PSS  
446 features require significantly more computational resources. As such, we directed PSS feature analysis to the  
447 population of cells, inhibitory cells, that we believed warranted further differentiability. Second, this model  
448 does not make use of all the information present at the soma of neurons. For example, the detailed ultrastructure  
449 visible in the imagery is not fully utilized. Other methods have utilized the underlying imagery of cells to  
450 distinguish cell types, either through detection of more subcellular organelles like cilia or by using imagery  
451 more directly to define abstract embeddings.<sup>56,58,59</sup> Such methods could augment the perisomatic features we  
452 have described here.

453

454 Beyond the somatic region, there are a large variety of studies have shown how local features visible in the  
455 ultrastructure contain information that encode information about cell types, including neurotransmitters of fly  
456 synapses, identity of neuromodulatory axons, or cutouts of local dendrite and axons.<sup>56,60</sup> These results all  
457 support the view that large scale quantitative measurements of ultrastructure provides a rich basis for identifying  
458 cellular properties of cells. Focusing on the somatic region is particularly useful because volumes of all sizes  
459 encounter volume boundaries or limits in reconstruction accuracy and somas are singular locations of cells. We  
460 believe that the efficacy of this approach provides a roadmap for how to develop a scalable platform for  
461 leveraging local features of cells to infer cell-type classifications. Beyond neuroscience, this approach illustrates  
462 how large scale ultrastructural imaging of cells can facilitate study of highly diverse and rare cell populations  
463 if paired with appropriate quantitative analysis.

## 464 Methods

### 465 MICrONS Dataset

466 This dataset consists of a 1.4mm x 800 $\mu$ m x 800 $\mu$ m volumetric serial section EM dataset from mouse visual  
467 cortex of a male P87 mouse. The dataset covers all layers of cortex and spanning primary visual cortex and two  
468 higher visual areas. The dataset has been described in detail elsewhere.<sup>3</sup> Briefly, two photon imaging was  
469 performed on the mouse, which was subsequently prepared for electron microscopy. The specimen was then  
470 sectioned and imaged using transmission electron microscopy.<sup>1</sup> The images were then stitched, aligned, and  
471 processed through a deep learning segmentation algorithm, followed by manual proofreading.<sup>1–3,16</sup>

## 472 Cortical Column

473 In this manuscript we leveraged proofreading and labels that were done as part of a separate study of a 100 $\mu$ m  
474 columnar region of primary visual cortex within the larger dataset.<sup>16</sup> For clarity to the reader and completeness  
475 we are repeating some aspects of the methods that define that column here.

476

477 **Column Selection:** The column borders were found by manually identifying a region in the primary visual  
478 cortex that was as far as possible from both the volume boundaries and the boundaries with higher order visual  
479 areas. A 100 x 100  $\mu$ m box was placed on layer 2/3 and was extended along the y axis of the dataset. While  
480 analyzing the data, it was observed that deep layer neurons had apical dendrites that were not oriented along  
481 the most direct pia-to-white-matter direction, and thus adapted the definition of the column to accommodate  
482 these curved neuronal streamlines. Using a collection of layer 5 ET cells, points were placed along the apical  
483 dendrite to the cell body and then along the primary descending axon towards white matter. The slant angle  
484 was computed as two piecewise linear segments, one along the cortical depth to lower layer 5 where little slant  
485 was observed, and one along the direction defined by the vector averaged direction of the labeled axons.

486

487 Using these boundaries and nucleus centroids,<sup>3</sup> all cells were identified inside the columnar volume. Coarse  
488 cell classes (excitatory, inhibitory, and non-neuronal) were assigned based on brief manual examination and  
489 rechecked by subsequent proofreading and confusion with early versions of the classifiers described here. To  
490 facilitate concurrent analysis and proofreading, all false merges were split connecting any column neurons to  
491 other cells (as defined by detected nuclei) before continuing with other work.

492

493 **Proofreading:** Proofreading was performed primarily by five expert neuroanatomists using the  
494 PyChunkedGraph<sup>57,61</sup> infrastructure and a modified version of Neuroglancer.<sup>62</sup> Proofreading was aided by on-  
495 demand highlighting of branch points and tips on user-defined regions of a neuron based on rapid  
496 skeletonization (<https://github.com/AllenInstitute/Guidebook>). This approach quickly directed proofreader  
497 attention to potential false merges and locations for extension, as well as allowed a clear record of regions of  
498 an arbor that had been evaluated.

499

500 For dendrites, all branch points were checked for correctness and all tips to see if they could be extended.  
501 False merges of simple axon fragments onto dendrites were often not corrected in the raw data, since they could  
502 be computationally filtered for analysis after skeletonization (see below). Detached spine heads were not  
503 comprehensively proofread, and previous estimates place the rate of detachment at approximately 10-15%.

504

505 For inhibitory axons, axons were "cleaned" of false merges by looking at all branch points. Axonal tips were  
506 extended until either their biological completion or data ambiguities, particularly emphasizing all thick branches  
507 or tips that were well-suited to project to new laminar regions. For axons with many thousand synaptic outputs,  
508 some but not all tips were followed to completion once major branches were cleaned and established. For  
509 smaller neurons, particularly those with bipolar or multipolar morphology, most tips were extended to the point  
510 of completion or ambiguity. Axon proofreading time differed significantly by cell type not only because of  
511 differential total axon length, but axon thickness differences that resulted in differential quality of auto  
512 segmentations, with thicker axons being of higher initial quality. Typically, inhibitory axon cleaning and  
513 extension took 3-10 hours per neuron. Expert neuroanatomists further labeled excitatory and inhibitory neurons  
514 into subclasses. Layer definitions were based on considerations of both cell body density (in analogy with  
515 nuclear staining) supplemented by identifying kinks in the depth distribution of nucleus size near expected layer  
516 boundaries.

517

518 **Cell Labeling:** For excitatory neurons, the categories used were: Layer 2/3-IT, Layer 4-IT, Layer 5-IT, Layer  
519 5-ET, Layer 5-NP, Layer 6-IT, and Layer 6-CT cells. Layer 2/3 and upper Layer 4 cells were defined on the  
520 basis of dendritic morphology and cell body depth. Layer 5 cells were similarly defined by cell body depth,  
521 with projection subclasses distinguished by dendritic morphology following Gouwens, Sorenson, and Berg<sup>9</sup>  
522 and classical descriptions of thick (ET) and thin-tufted (IT) cells. Layer 5 ET cells had thick apical dendrites,  
523 large cell bodies, numerous spines, a pronounced apical tuft, and deeper ET cells had many oblique dendrites.  
524 Layer 5 IT cells had more slender apical dendrites and smaller tufts, fewer spines, and fewer dendritic branches  
525 overall. Layer 5 NP cells corresponded to the "Spiny 10" subclass described in Gouwens, Sorenson, and Berg;  
526 these cells had few basal dendritic branches, each very long and with few spines or intermediate branch points.  
527 Layer 6 neurons were defined by cell body depth, but only some cells were able to be labeled as IT or CT by  
528 human experts. Layer 6 pyramidal cells with stellate dendritic morphology, inverted apical dendrites, or wide  
529 dendritic arbors were classified as IT cells. Layer 6 pyramidal cells with small and narrow basal dendrites, an  
530 apical dendrite ascending to Layer 4 or Layer 1, and a myelinated primary axon projecting into white matter  
531 were labeled as CT cells.

532

533 Basket cells were recognized as cells which made more than 20% of their synaptic inputs onto the soma or  
534 proximal dendrites of cells. Neurogliaform cells were recognized by having a low density of output synapses,  
535 and boutons that had often had synaptic vesicles but no post-synaptic structures. Bipolar cells were labeled by  
536 having only 2 or 3 primary dendrites, and primarily making synapses with other inhibitory neurons. Note, the  
537 Martinotti/non-Martinotti subclass label was given to cells that have previously been described in the literature  
538 to primarily target the distal dendrites of excitatory neurons without exhibiting hallmark features of bi-polar or  
539 neurogliaform cells.

540

541 Due to high levels of proofreading in the column, there were very few errors thus the training set was augmented  
542 with manually labeled errors from the entire dataset.

## 543 Proofreading and Truncation Analysis

544 For every proofread cell in the cortical column (described above) we compared the cellular volume of the initial  
545 reconstruction from the automated segmentation to the cleaned and completed reconstruction. To measure the  
546 precision connectivity for each cell we noted the number of synapses that got removed with proofreading, the  
547 number of synapses that were added, and the number of synapses that were maintained with each cell before  
548 and after proofreading.

549 To estimate the likelihood of truncation, we measured the distribution of dendritic extents from the proofread  
550 column cells. For each cell we measured the radial distance of each input synapse from the cell's soma. The  
551 radial extent of a given cell was considered the distance of the 97th percentile input synapse. From this  
552 distribution we used the median value of 121 microns as a threshold for dendritic truncation, although closer to  
553 250 microns would be required to guarantee no truncation for any cell. For the rest of the cells in the dataset,  
554 we measured the distance of the soma from the volume borders in x and z. The overlap in these distributions  
555 relates to the probability of truncation, leading to our conclusion that roughly one third of the cells have some  
556 degree of dendritic truncation.

## 557 Generating Nucleus and Soma Features

558 We analyzed nuclei using the results of a deep neural network segmentation,<sup>3</sup> extracted the mesh using  
559 marching cubes and obtained the largest component of the detected mesh. Nuclear features were then extracted

560 on the remaining meshes. These features included, nucleus volume, nucleus area, the area to volume ratio,  
561 nucleus surface area within an infolding, the fraction of the total surface area within an infolding, and cortical  
562 depth (measured as the distance from the pial surface). Nucleus fold features were extracted by creating a shrink  
563 wrapped<sup>47</sup> mesh for each nucleus mesh. We then calculated the distance of each vertex on the nucleus mesh  
564 from the shrink-wrapped mesh. After visual inspection of cells across all the reported subclasses, any vertex  
565 further than 150 nm was considered within an infolding.

566  
567 For each nucleus detection the somatic compartment was identified as the ID in the segmentation which  
568 surrounded >80% of the nucleus. Somatic segmentations (downloaded at 64x64x40 nm resolution) went  
569 through a heuristic cleaning procedure to remove missing slices of data and incorrectly merged fragments. Since  
570 each soma was matched to its corresponding nucleus, 15 microns surrounding the nucleus' center of mass was  
571 cut out from the dense segmentation and converted into a binary mask. 15 microns was chosen due to the high  
572 quality of the segmentation (Fig. 2a) and it was large enough to encompass the entire soma of all cells from the  
573 smallest glial cell to the largest 5P-ET neuron. Binary dilation by 5 voxels in 3d was performed, followed by  
574 filling of all holes, and then binary erosion of 3 voxels. The resulting binary mask was meshed using marching  
575 cubes and connected component analysis was run on the result. 5 voxels was deemed an appropriate dilation to  
576 remove merged fragments without creating additional holes in the mesh. The largest connected component  
577 mesh was retained, and any disconnected components were dropped. Somatic features were extracted for all  
578 nuclear detections that were not cut off by the volume boundary (see Filtering procedure). These somatic  
579 features included soma area, soma volume, the area to volume ratio, the number of synapses on the somatic  
580 cutout, and the soma synapse density. Using both the somatic and nucleus meshes, we calculated the ratio  
581 between the nucleus volume and soma volume and the offset between the two, measured as the euclidean  
582 distance between nuclear center of mass and soma center of mass.

583  
584 **Filtering procedure:** There were 133,580 nuclear detections in the dataset and the filtering procedure consisted  
585 of three steps. Firstly, any detected objects less than  $25\mu\text{m}^3$  were filtered out as errors as these largely consisted  
586 of small fragments of nucleoli. Second, after identifying the segment IDs within a  $15\mu\text{m}$  bounding box around  
587 each nucleus, if over 20% of these IDs corresponded to error ID 0, they were filtered out. The majority of these  
588 error cases were cells close to the volume border or areas in the volume with higher segmentation errors such  
589 as those near blood vessels. Thirdly, cells that were predicted as errors based on the object classifier of the  
590 hierarchical model described below (Fig. 5a) were also removed from analysis. This resulted in a final set of  
591 94,010 cells, neuronal and nonneuronal.

592  
593 **Feature normalization:** Due to differences in section thickness during sample preparation, we noticed abrupt  
594 shifts in nucleus and soma size features along the sectioning axis (Z plane). This presumably is due to changes  
595 in section thickness across the dataset. To account for these abrupt and systematic shifts we binned the entire  
596 dataset by the longest length scale for which there didn't appear to be systematic shifts in the distribution in the  
597 z plane (800 nm) and normalized each feature value by the average within each Z bin.

598  
599 For 2D UMAP embeddings and training of the classifiers it was important to place all features in approximately  
600 similar scales. For this reason, we independently Z-scored each feature across all cells and used that as the input  
601 for classifier training as well as the UMAP embeddings in Fig. 3-6.

## 602 Generating PSS Features

603 Around each synapse, we extracted a 3500 nm region to obtain the synapse region mesh. We experimented with  
604 region cutouts between 1000 to 5000 nm, however smaller cutouts led to ambiguities in the main shaft  
605 identification and thereby produced errors in the subsequent skeletonization. At 3500 nm the skeletons were



606 more stable and segmenting as expected. This mesh was then segmented using the CGAL surface segmentation  
607 algorithm<sup>63</sup> which splits regions based on differences in thickness. We adapted our previously developed  
608 method<sup>27</sup> to identify the PSS region by using a local skeleton calculated from the synapse region mesh, rather  
609 than a precomputed whole cell mesh. This allowed us to adapt this method for cells in the dataset without the  
610 need for proofreading.

611

612 Given a cell for which all PSS have been extracted within a 60 micron radius from the nucleus center, the  
613 objective was to build a descriptor that encapsulates the various properties of the PSS. Initially we extracted  
614 PSS from within 120 micron radius. However, upon inspection of the normalized histograms and the 2D UMAP  
615 embedding space, the additional radial bins did not increase our differentiability and did increase truncation  
616 effects near the dataset thus we reduced the radius to 60 microns. In particular, we aim to capture two of these  
617 properties: the type of shape of the PSS and the distance of the PSS from the soma. For the shape, a dictionary  
618 of all shape types is built using the dictionary dataset from.<sup>27</sup> These shapes were rotationally normalized and  
619 used to train a pointnet autoencoder<sup>64</sup> to learn a latent representation of size 1024. The high dimensional latent  
620 space spanning all these shapes is a continuous space (Extended Data Fig. 3) which was used to generate a Bag  
621 of Words model<sup>30</sup> for the shapes. To ensure we were sampling the entire embedding space, we performed K-  
622 means clustering with K=30 to estimate cluster centers. The top row of Fig. 4c shows the shape in the dictionary  
623 that is closest to each of these cluster centers. For distance binning, we split the 60 micron radius around the  
624 nucleus center into four 15 micron radial bins (Fig. 4c). All PSS were then binned according to their shape and  
625 distance properties to generate a histogram of counts. This histogram was Z-scored and then added to the rest  
626 of the features as input to classifiers and the UMAP embedding Fig. 4 and Fig. 6.

## 627 Hierarchical Model Training and Validation

628 **Hierarchical Framework:** We defined an object as the segmentation associated with a predicted nucleus<sup>3</sup> from  
629 which nucleus, soma, and PSS features could be extracted. A hierarchical framework was designed to predict  
630 the cell type of any such object (Fig. 5c). To begin, there were 106,761 nuclear segmentations that passed the  
631 first two filters described above (see filtering procedure). The first level in the hierarchy predicted whether an  
632 object was a neuron (72,158), nonneuron (21,856), or an error (12,751). All objects predicted as errors were  
633 excluded from all subsequent analyses except for the hierarchical model evaluation. Nonneuronal cells were  
634 then classified as one of the following: astrocyte (7,850), microglia (2,638), oligodendrocyte (7,020),  
635 oligodendrocyte precursor cells (OPC) (1,703), or pericyte (2,645). For neurons, cells were predicted as either  
636 excitatory (64,195) or inhibitory (7,963) followed by a separate subclass classifier for each class type.  
637 Excitatory subclasses: Layer 2/3 pyramidal (19,735), Layer 4 pyramidal (14,777), Layer 5 IT (7,949), Layer 5  
638 ET (2,215), Layer 5 near projecting (NP) pyramidal (970), Layer 6 IT (11,734), Layer 6 CT pyramidal (6,815).  
639 After extracting PSS features from all predicted inhibitory neurons, a subset of neurons (n=1,158) that were  
640 actually excitatory clearly separated from the rest of the cells in the perisomatic feature space (with PSS  
641 features). This was expected due to known differences in proximal dendrite morphology between inhibitory  
642 and excitatory neurons. These neurons were then passed through the excitatory neuron classifier and labeled as  
643 excitatory for all subsequent analyses with a final set of 6,805 inhibitory cells with the following subclass  
644 counts: Basket cells (3,239), Bipolar cells (997), Martinotti/non-Martinotti cells (1,992), and Neurogliaform  
645 cells (571).

646

647 **Training:** Soma and nucleus features were extracted from the 3D mesh of all objects and PSS features were  
648 extracted for all neurons predicted as inhibitory. For each level of the hierarchy, multiple classifiers were trained  
649 using either nucleus only, nucleus and soma features, or nucleus, soma, and PSS features. Within each level of  
650 the hierarchy, classifiers were trained using the cells and labels from the manually annotated cortical column.  
651 Due to the sparsity of some of the cell classes, we augmented the training set in the following ways: 470 errors

652 were added from within and around the column for the object model, 11 proofread 5P-NP cells and 250  
653 proofread 5P-ET cells were added to train the excitatory subclass model.

654

655 For each classifier, model type was chosen using a randomized grid search for the following models: Support  
656 Vector Machine SVM with a linear kernel, SVM with a radial basis function kernel, Nearest Neighbors,  
657 Random Forest Classifier, Decision Tree and Neural Network. For each type, 50 models were trained with  
658 varying parameters and the top performing model was chosen. Individual models were further optimized using  
659 10-fold cross validation evaluated based on accuracy and F1 score (a measure for precision and recall). Training,  
660 and test examples were held consistent across models for direct performance comparison within each level.

661

#### 662 **Model Performance and Validation:**

663 The hierarchical model was defined as the sequential combination of the best performing classifiers at each  
664 level. To see the performance of the all different feature sets at each level of the hierarchy please see Extended  
665 Data Table 1. The overall performance of the hierarchical model was measured with a test set that involved  
666 manual inspection of 100 examples of each of the neuronal and nonneuronal subclasses as well as errors. This  
667 resulted in a test set of 1700 cells. Cross validation and test performance for the hierarchical model are reported  
668 below (Extended Data Fig.4). Note that all scores reported are the weighted accuracy based on the sampling  
669 rate of each class within the column.

670

671 The top level of the hierarchy (the object model), distinguished neurons from non-neurons as well as erroneous  
672 detections. The cross validated accuracy score on the column was 96% with a test score of 97%. The second  
673 level of the model simply distinguished excitatory from inhibitory neurons. Here, the column cross validated  
674 accuracy score was 94% and the test set was 93%. Overall, across all subclasses, the hierarchical model on the  
675 column had a cross validated accuracy of 91% and a dataset wide test set accuracy of 82%.

#### 676 **Chandelier Cell Identification**

677 Chandelier cells are characterized by their unique axo-axonal synapses onto the AIS of target pyramidal cells.  
678 As there were no chandelier cells within the densely reconstructed column, we sought to test if the perisomatic  
679 feature space would facilitate an enriched dataset wide search for these cells. After identifying and proofreading  
680 a chandelier cell, we selected the top 20 nearest neighbors by euclidean distance using a KDTree search of the  
681 perisomatic feature space (nucleus, soma, and PSS features) after z-score normalization of each feature across  
682 cells. We also selected 20 random cells from the predicted inhibitory neurons. For each of these 40 cells, we  
683 proofread the reconstructions to ensure that there were no extraneous neurites attached, and extended the axon  
684 until there were at minimum 100 output synapses. On average the 20 nearest neighbors had 590 output synapses  
685 attached and the random cells had 809 synapses attached.

686

687 To quantify whether a given cell was a chandelier or not, we measured the angle ( $\phi$ ) and the distance ( $r$ ) between  
688 every output synapse and the soma of the postsynaptic cell (Fig. 6c). A synapse with an angle value of  $0^\circ$  would  
689 be considered straight above the target soma whereas an angle of  $180^\circ$  would be right below. Due to variations  
690 in axon directionality with respect to the pial surface, we determined that synapses with angle values between  
691  $160-180^\circ$  and within 60 microns of the soma were considered on the AIS of the target soma. In fact, because  
692 the specificity of chandelier targeting is so high, the density of synapse angle distributions alone was enough to  
693 identify other chandelier cells (Fig. 6e). Upon inspection of the proofread 20 nearest neighbors, we determined  
694 that cells with over 40% of their synapses within  $160-180^\circ$  were chandelier cells. The average normalized  
695 density for the identified cells was 62% as compared to 8% for the non chandelier cells.

## 696 Inhibitory Neuron Output Targeting

697 After characterizing a single 5P-NP targeting cell, we applied a similar strategy to the one above to search for  
698 more neurons in the dataset that had a similar connectivity pattern. We selected the top 20 nearest neighbors by  
699 euclidean distance in the perisomatic feature space using KDTree search. These cells were proofread to remove  
700 false mergers and extend the axon to include at minimum 100 synapses. It should be noted that there were 5  
701 cells where the axons could not be extended due to volume boundaries or segmentation errors so they were  
702 replaced with the 5 nearest cells. On average the 20 nearest neighbors had 448 synapses attached.

703

704 To quantify whether a cell preferentially targeted 5P-NP neurons, we measured the fraction of total output that  
705 targeted different predicted subclasses. Cells that output over 30% of their synapses onto 5P-NP cells were  
706 considered to have this rare connectivity preference.

## 707 Predicted Subclass Densities

708 To measure the predicted cell densities per subclass across the MICrONS dataset, we divided the dataset  
709 into  $50\mu\text{m}^2$  bins in the XZ plane. Within each bin we calculated the number of cells for each subclass and  
710 scaled that to a  $\text{mm}^2$  to facilitate direct comparisons to reported densities in the literature.

## 711 Dataset 2

712 The second dataset covers a millimeter square cross-sectional area, and 50 microns of depth within the primary  
713 visual cortex of a P49 male mouse.<sup>19,23,57</sup> The largest available segmentation spans Layer 2/3 of the cortex  
714 through to Layer 6. After applying the nuclear detection model<sup>19</sup> and filtering out all nuclear objects below  
715  $25\mu\text{m}^3$  and cells that were cut off by the volume border (see Filtering procedure above), 1,944 cells were used  
716 for the analysis. Class type of each cell was labeled manually and used as ground truth. Due to thinness of the  
717 volume, much of the distal cell morphologies were cut off and thus subclass type labeling was not possible.  
718 Nuclear and somatic mesh cleaning as well as feature extraction and normalization followed the same  
719 procedures outlined above.

720

721 All datasets described in the manuscript are publicly available at <https://microns-explorer.org/> and  
722 <https://bosssdb.org/>

## 723 Contributions

724 Analyzed Data: LE, SS, FC

725 Developed Nucleus Model: SM, GM, LE, FC

726 Cell Typing: AB, NDC, CSM, JB

727 Paper Writing: LE, SS, FC

728 Dataset + segmentation generation: collaboration Proofreading: collaboration

729 Analysis infrastructure: collaboration

## 730 Support

731 LE was supported by RF1 MH117808

732

## 733 References

734

- 735 1. Yin, W. *et al.* A petascale automated imaging pipeline for mapping neuronal circuits with high-  
736 throughput transmission electron microscopy. *Nat. Commun.* **11**, 4949 (2020).
- 737 2. Macrina, T. *et al.* Petascale neural circuit reconstruction: automated methods. 2021.08.04.455162  
738 Preprint at <https://doi.org/10.1101/2021.08.04.455162> (2021).
- 739 3. Consortium, Mic. *et al.* Functional connectomics spanning multiple areas of mouse visual cortex.  
740 2021.07.28.454025 Preprint at <https://doi.org/10.1101/2021.07.28.454025> (2021).
- 741 4. Phelps, J. S. *et al.* Reconstruction of motor control circuits in adult *Drosophila* using automated  
742 transmission electron microscopy. *Cell* **184**, 759-774.e18 (2021).
- 743 5. Motta, A. *et al.* Dense connectomic reconstruction in layer 4 of the somatosensory cortex. *Science*  
744 **366**, eaay3134 (2019).
- 745 6. Dorkenwald, S. *et al.* Neuronal wiring diagram of an adult brain. *bioRxiv* 2023.06.27.546656  
746 (2023) doi:10.1101/2023.06.27.546656.
- 747 7. Shapson-Coe, A. *et al.* A connectomic study of a petascale fragment of human cerebral cortex.  
748 2021.05.29.446289 Preprint at <https://doi.org/10.1101/2021.05.29.446289> (2021).
- 749 8. Kanari, L. *et al.* Objective Morphological Classification of Neocortical Pyramidal Cells. *Cereb.*  
750 *Cortex* **29**, 1719–1735 (2019).
- 751 9. Gouwens, N. W. *et al.* Classification of electrophysiological and morphological neuron types in  
752 the mouse visual cortex. *Nat. Neurosci.* **22**, 1182–1195 (2019).
- 753 10. Scorcioni, R., Polavaram, S. & Ascoli, G. A. L-Measure: a web-accessible tool for the analysis,  
754 comparison and search of digital reconstructions of neuronal morphologies. *Nat. Protoc.* **3**, 866–  
755 876 (2008).
- 756 11. Costa, M., Manton, J. D., Ostrovsky, A. D., Prohaska, S. & Jefferis, G. S. X. E. NBLAST: Rapid,  
757 Sensitive Comparison of Neuronal Structure and Construction of Neuron Family Databases.  
758 *Neuron* **91**, 293–311 (2016).
- 759 12. Packer, A. M. & Yuste, R. Dense, Unspecific Connectivity of Neocortical Parvalbumin-Positive  
760 Interneurons: A Canonical Microcircuit for Inhibition? *J. Neurosci.* **31**, 13260–13271 (2011).

- 761 13. Defelipe, J., Hendry, S. H. C., Jones, E. G. & Schmechel, D. Variability in the terminations of  
762 GABAergic chandelier cell axons on initial segments of pyramidal cell axons in the monkey  
763 sensory-motor cortex. *J. Comp. Neurol.* **231**, 364–384 (1985).
- 764 14. Fairén, A. & Valverde, F. A specialized type of neuron in the visual cortex of cat: A Golgi and  
765 electron microscope study of chandelier cells. *J. Comp. Neurol.* **194**, 761–779 (1980).
- 766 15. Somogyi, P., Freund, T. F. & Cowey, A. The axo-axonic interneuron in the cerebral cortex of the  
767 rat, cat and monkey. *Neuroscience* **7**, 2577–2607 (1982).
- 768 16. Schneider-Mizell, C. M. *et al.* Cell-type-specific inhibitory circuitry from a connectomic census  
769 of mouse visual cortex. 2023.01.23.525290 Preprint at <https://doi.org/10.1101/2023.01.23.525290>  
770 (2023).
- 771 17. Gamlin, C. R. *et al.* Integrating EM and Patch-seq data: Synaptic connectivity and target  
772 specificity of predicted Sst transcriptomic types. 2023.03.22.533857 Preprint at  
773 <https://doi.org/10.1101/2023.03.22.533857> (2023).
- 774 18. Bodor, A. L. *et al.* The Synaptic Architecture of Layer 5 Thick Tufted Excitatory Neurons in the  
775 Visual Cortex of Mice. 2023.10.18.562531 Preprint at <https://doi.org/10.1101/2023.10.18.562531>  
776 (2023).
- 777 19. Turner, N. L. *et al.* Reconstruction of neocortex: Organelles, compartments, cells, circuits, and  
778 activity. *Cell* **185**, 1082–1100.e24 (2022).
- 779 20. Peters, A. & Kara, D. A. The neuronal composition of area 17 of rat visual cortex. I. The  
780 pyramidal cells. *J. Comp. Neurol.* **234**, 218–241 (1985).
- 781 21. Georgiou, C. *et al.* A subpopulation of cortical VIP-expressing interneurons with highly dynamic  
782 spines. *Commun. Biol.* **5**, 1–15 (2022).
- 783 22. Kim, E. J., Juavinett, A. L., Kyubwa, E. M., Jacobs, M. W. & Callaway, E. M. Three Types of  
784 Cortical Layer 5 Neurons That Differ in Brain-wide Connectivity and Function. *Neuron* **88**,  
785 1253–1267 (2015).
- 786 23. Schneider-Mizell, C. M. *et al.* Structure and function of axo-axonic inhibition. *eLife* **10**, e73783  
787 (2021).
- 788 24. Kubota, Y., Karube, F., Nomura, M. & Kawaguchi, Y. The Diversity of Cortical Inhibitory

- 789            Synapses. *Front. Neural Circuits* **10**, 27 (2016).
- 790            25. Callaway, E. M. Inhibitory Cell Types, Circuits and Receptive Fields in Mouse Visual Cortex. in  
791            *Micro-, Meso- and Macro-Connectomics of the Brain* (eds. Kennedy, H., Van Essen, D. C. &  
792            Christen, Y.) (Springer, 2016).
- 793            26. Sultan, K. T. & Shi, S.-H. GENERATION OF DIVERSE CORTICAL INHIBITORY  
794            INTERNEURONS. *Wiley Interdiscip. Rev. Dev. Biol.* **7**, 10.1002/wdev.306 (2018).
- 795            27. Seshamani, S. *et al.* Automated Neuron Shape Analysis from Electron Microscopy.  
796            <http://arxiv.org/abs/2006.00100> (2020) doi:10.48550/arXiv.2006.00100.
- 797            28. Sholl, D. A. Dendritic organization in the neurons of the visual and motor cortices of the cat. *J.*  
798            *Anat.* **87**, 387-406.1 (1953).
- 799            29. Keller, D., Erö, C. & Markram, H. Cell Densities in the Mouse Brain: A Systematic Review.  
800            *Front. Neuroanat.* **12**, (2018).
- 801            30. Rudy, B., Fishell, G., Lee, S. & Hjerling-Leffler, J. Three groups of interneurons account for  
802            nearly 100% of neocortical GABAergic neurons. *Dev. Neurobiol.* **71**, 45–61 (2011).
- 803            31. Kim, Y. *et al.* Brain-wide Maps Reveal Stereotyped Cell-Type-Based Cortical Architecture and  
804            Subcortical Sexual Dimorphism. *Cell* **171**, 456-469.e22 (2017).
- 805            32. Cragg, B. G. The density of synapses and neurones in the motor and visual areas of the cerebral  
806            cortex. *J. Anat.* **101**, 639–654 (1967).
- 807            33. Kapfer, C., Glickfeld, L. L., Atallah, B. V. & Scanziani, M. Supralinear increase of recurrent  
808            inhibition during sparse activity in the somatosensory cortex. *Nat. Neurosci.* **10**, 743–753 (2007).
- 809            34. Pfeffer, C. K., Xue, M., He, M., Huang, Z. J. & Scanziani, M. Inhibition of inhibition in visual  
810            cortex: the logic of connections between molecularly distinct interneurons. *Nat. Neurosci.* **16**,  
811            1068–1076 (2013).
- 812            35. Lee, S., Kruglikov, I., Huang, Z. J., Fishell, G. & Rudy, B. A disinhibitory circuit mediates motor  
813            integration in the somatosensory cortex. *Nat. Neurosci.* **16**, 1662–1670 (2013).
- 814            36. Pi, H.-J. *et al.* Cortical interneurons that specialize in disinhibitory control. *Nature* **503**, 521–524  
815            (2013).
- 816            37. Jones, E. G. Varieties and distribution of non-pyramidal cells in the somatic sensory cortex of the

- 817 squirrel monkey. *J. Comp. Neurol.* **160**, 205–267 (1975).
- 818 38. Peters, A., Proskauer, C. C. & Ribak, C. E. Chandelier cells in rat visual cortex. *J. Comp. Neurol.*  
819 **206**, 397–416 (1982).
- 820 39. Sorensen, S. A. *et al.* Correlated Gene Expression and Target Specificity Demonstrate Excitatory  
821 Projection Neuron Diversity. *Cereb. Cortex* **25**, 433–449 (2015).
- 822 40. Celii, B. *et al.* NEURD: automated proofreading and feature extraction for connectomics.  
823 2023.03.14.532674 Preprint at <https://doi.org/10.1101/2023.03.14.532674> (2023).
- 824 41. Weis, M. A. *et al.* Large-scale unsupervised discovery of excitatory morphological cell types in  
825 mouse visual cortex. 2022.12.22.521541 Preprint at <https://doi.org/10.1101/2022.12.22.521541>  
826 (2023).
- 827 42. Buchanan, J. *et al.* Oligodendrocyte precursor cells ingest axons in the mouse neocortex. *Proc.*  
828 *Natl. Acad. Sci. U. S. A.* **119**, e2202580119 (2022).
- 829 43. Kepecs, A. & Fishell, G. Interneuron Cell Types: Fit to form and formed to fit. *Nature* **505**, 318–  
830 326 (2014).
- 831 44. Gouwens, N. W. *et al.* Integrated Morphoelectric and Transcriptomic Classification of Cortical  
832 GABAergic Cells. *Cell* **183**, 935-953.e19 (2020).
- 833 45. Scala, F. *et al.* Phenotypic variation of transcriptomic cell types in mouse motor cortex. *Nature*  
834 **598**, 144–150 (2021).
- 835 46. Attili, S. M., Silva, M. F. M., Nguyen, T.-V. & Ascoli, G. A. Cell numbers, distribution, shape,  
836 and regional variation throughout the murine hippocampal formation from the adult brain Allen  
837 Reference Atlas. *Brain Struct. Funct.* **224**, 2883–2897 (2019).
- 838 47. Luengo-Sanchez, S. *et al.* A univocal definition of the neuronal soma morphology using Gaussian  
839 mixture models. *Front. Neuroanat.* **9**, (2015).
- 840 48. Fariñas, I. & DeFelipe, J. Patterns of synaptic input on corticocortical and corticothalamic cells in  
841 the cat visual cortex. I. The cell body. *J. Comp. Neurol.* **304**, 53–69 (1991).
- 842 49. Gilman, J. P., Medalla, M. & Luebke, J. I. Area-Specific Features of Pyramidal Neurons—a  
843 Comparative Study in Mouse and Rhesus Monkey. *Cereb. Cortex N. Y. NY* **27**, 2078–2094  
844 (2017).

- 845 50. Tasic, B. *et al.* Shared and distinct transcriptomic cell types across neocortical areas. *Nature* **563**,  
846 72–78 (2018).
- 847 51. Kim, E. J., Juavinett, A. L., Kyubwa, E. M., Jacobs, M. W. & Callaway, E. M. Three Types of  
848 Cortical Layer 5 Neurons That Differ in Brain-wide Connectivity and Function. *Neuron* **88**,  
849 1253–1267 (2015).
- 850 52. Wittmann, M. *et al.* Synaptic Activity Induces Dramatic Changes in the Geometry of the Cell  
851 Nucleus: Interplay between Nuclear Structure, Histone H3 Phosphorylation, and Nuclear Calcium  
852 Signaling. *J. Neurosci.* **29**, 14687–14700 (2009).
- 853 53. Villa, K. L. & Nedivi, E. Excitatory and Inhibitory Synaptic Placement and Functional  
854 Implications. in (2016). doi:10.1007/978-4-431-56050-0\_18.
- 855 54. Davis, T. L. & Sterling, P. Microcircuitry of cat visual cortex: classification of neurons in layer  
856 IV of area 17, and identification of the patterns of lateral geniculate input. *J. Comp. Neurol.* **188**,  
857 599–627 (1979).
- 858 55. Hwang, Y.-S. *et al.* 3D Ultrastructure of Synaptic Inputs to Distinct GABAergic Neurons in the  
859 Mouse Primary Visual Cortex. *Cereb. Cortex* **31**, 2610–2624 (2021).
- 860 56. Dorkenwald, S. *et al.* Multi-Layered Maps of Neuropil with Segmentation-Guided Contrastive  
861 Learning. 2022.03.29.486320 Preprint at <https://doi.org/10.1101/2022.03.29.486320> (2022).
- 862 57. Dorkenwald, S. *et al.* Binary and analog variation of synapses between cortical pyramidal  
863 neurons. *eLife* **11**, e76120 (2022).
- 864 58. Ott, C. M. *et al.* Nanometer-scale views of visual cortex reveal anatomical features of primary  
865 cilia poised to detect synaptic spillover. 2023.10.31.564838 Preprint at  
866 <https://doi.org/10.1101/2023.10.31.564838> (2023).
- 867 59. Zinchenko, V., Hugger, J., Uhlmann, V., Arendt, D. & Kreshuk, A. MorphoFeatures for  
868 unsupervised exploration of cell types, tissues, and organs in volume electron microscopy. *eLife*  
869 **12**, e80918 (2023).
- 870 60. Eckstein, N. *et al.* Neurotransmitter Classification from Electron Microscopy Images at Synaptic  
871 Sites in *Drosophila Melanogaster*. 2020.06.12.148775 Preprint at  
872 <https://doi.org/10.1101/2020.06.12.148775> (2023).



- 873 61. Dorkenwald, S. *et al.* FlyWire: Online community for whole-brain connectomics. *Nat. Methods*  
874 **19**, 119–128 (2022).
- 875 62. Maitin-Shepard, J. google/neuroglancer: (2021) doi:10.5281/zenodo.5573293.
- 876 63. Ilker O. Yaz and Sebastien Lorient. CGAL 5.4.1 - Triangulated Surface Mesh Segmentation: User  
877 Manual. [https://doc.cgal.org/latest/Surface\\_mesh\\_segmentation/index.html](https://doc.cgal.org/latest/Surface_mesh_segmentation/index.html).
- 878 64. Qi, C. R., Su, H., Mo, K. & Guibas, L. J. PointNet: Deep Learning on Point Sets for 3D  
879 Classification and Segmentation. Preprint at <https://doi.org/10.48550/arXiv.1612.00593> (2017).
- 880 65. Fei-Fei, L. & Perona, P. A Bayesian hierarchical model for learning natural scene categories. in  
881 *2005 IEEE Computer Society Conference on Computer Vision and Pattern Recognition*  
882 *(CVPR'05)* vol. 2 524–531 vol. 2 (2005).
- 883

884 Supplemental Information:

885 **Extended Data Table 1**

|                        | Nucleus<br>Column Cross-Validation<br>Accuracy | Soma + Nucleus<br>Column Cross-Validation<br>Accuracy | PSS + Soma + Nucleus<br>Column Cross-Validation<br>Accuracy |
|------------------------|------------------------------------------------|-------------------------------------------------------|-------------------------------------------------------------|
| 1. Object Class        | 0.90                                           | <b>0.96</b>                                           | —                                                           |
| 2. Nonneuron Class     | 0.94                                           | <b>0.98</b>                                           | —                                                           |
| 3. Neuron Class        | 0.95                                           | <b>0.99</b>                                           | —                                                           |
| 4. Excitatory Subclass | 0.88                                           | <b>0.90</b>                                           | —                                                           |
| 5. Inhibitory Subclass | 0.63                                           | 0.90                                                  | <b>0.94</b>                                                 |

Bolded Classifiers used in the Hierarchical Model

|                           | Column Cross-Validation<br>Accuracy | Dataset Wide Validation<br>Accuracy |
|---------------------------|-------------------------------------|-------------------------------------|
| <b>Hierarchical Model</b> | <b>0.91</b>                         | <b>0.82</b>                         |

886

887

888

889

890

891

892

893

894

895

896

897

898

899

900

901

902

903

904

905

906

907

908

909

910

911

912

913

914

**Extended Data Table 1: Cross validation accuracy scores for individual classifiers at each level of the hierarchical model with differing input features.** Each row corresponds to the corresponding numbers in the diagram in Fig. 5A. All training examples were held consistent between features sets for appropriate model comparisons. Classifiers with the highest accuracy score at each level were included in the hierarchical model (shown in bold). The overall hierarchical model performance on the column and the dataset wide validation set (see methods) is reported at the bottom.

915 **Extended Data Figure 1**

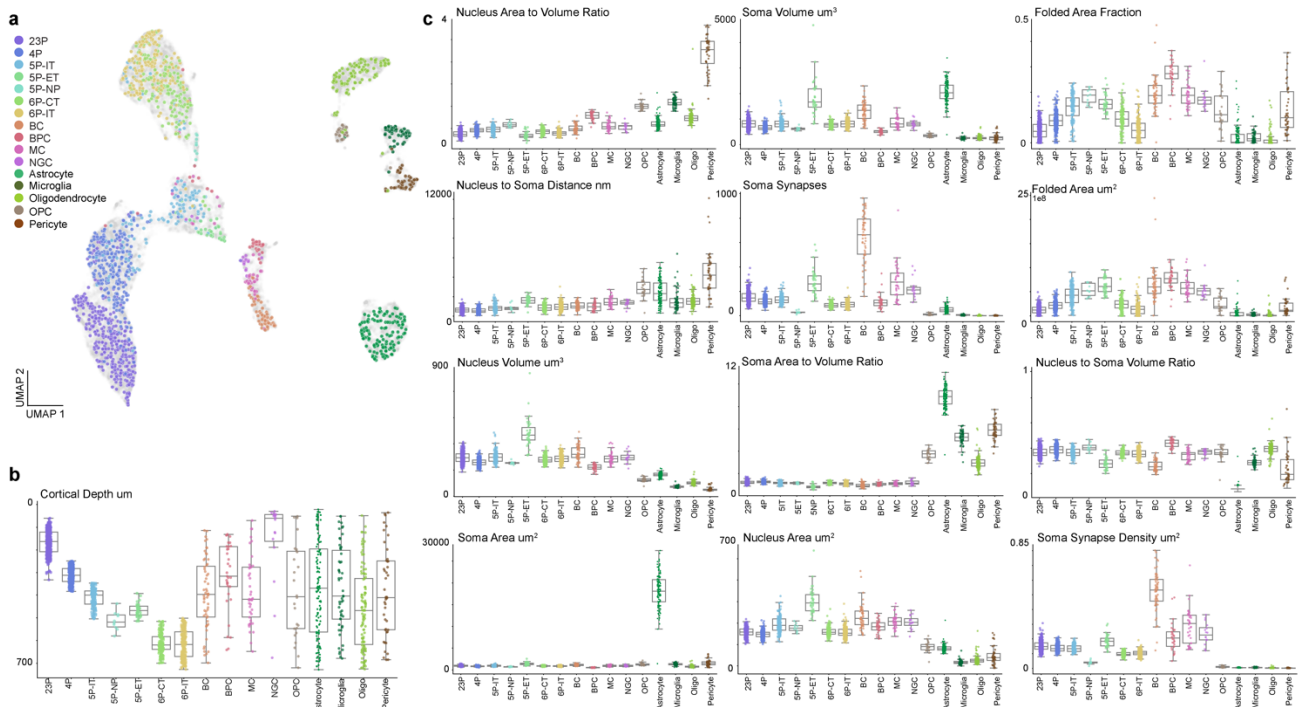

916  
 917 **Extended Data Figure 1: Neuronal and nonneuronal subclass distribution of individual soma and nucleus features.**  
 918 a) 2D UMAP embedding of all neuronal and nonneuronal cells inferred from somatic features, nuclear features and cortical  
 919 depth. Manually labeled cellular subclasses are represented in color (1,619) and unlabeled examples in light gray  
 920 ( $n=92,391$ ). b) Distribution and variation of cortical depth of all cells from the human labeled column dataset. c)  
 921 Distribution and variation of nucleus and somatic features of all cells from the column dataset. For all plots, mean and  
 922 variance each subclass represented by the boxplots while individual cells are noted in the overlaid swarm plots. Color  
 923 denotes human assigned subclass labels.

924  
 925  
 926  
 927  
 928  
 929  
 930  
 931  
 932  
 933  
 934  
 935  
 936  
 937  
 938  
 939  
 940  
 941  
 942  
 943

944

945 **Extended Data Figure 2**

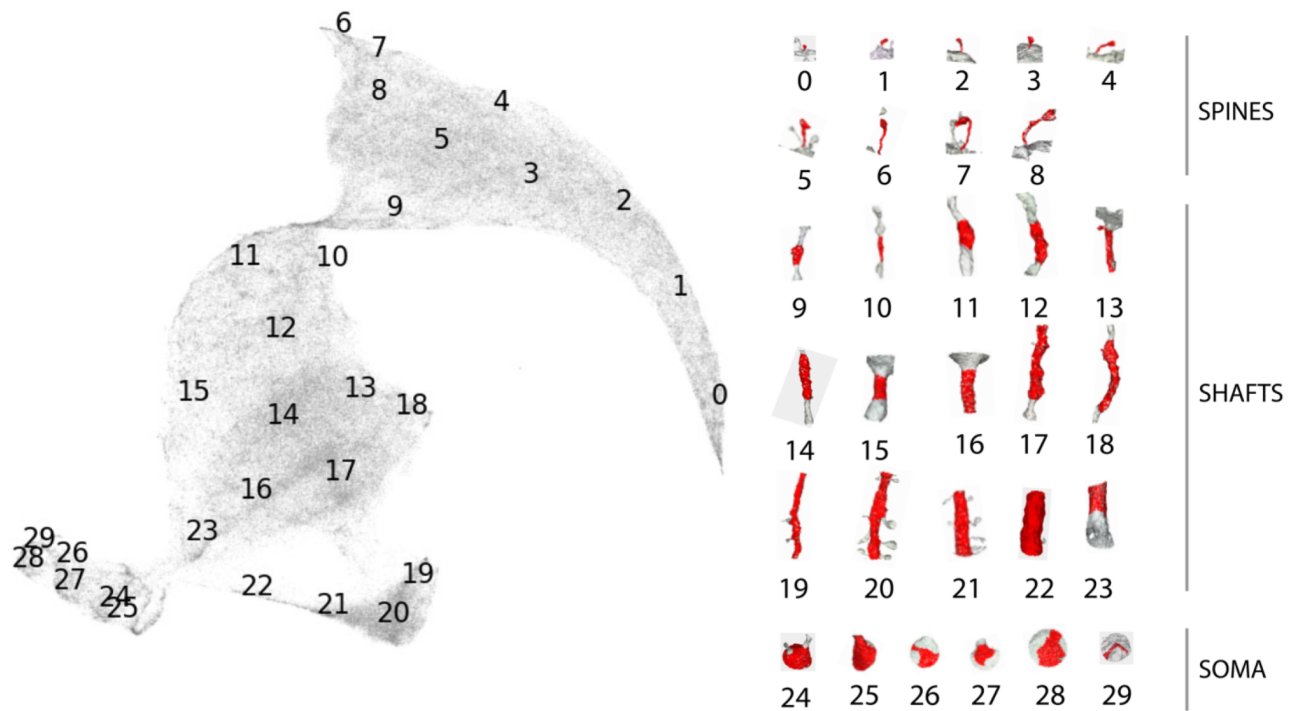

946

947 **Extended Data Figure 2: PSS embedding space organized by post-synaptic ultrastructural morphologies.** 2D UMAP

948 embedding of all shapes in the PSS Dictionary. The numbers indicate the bin centers mapped in this 2D space and the

949 corresponding PSS meshes on the right show the shape associated with each bin center. Bins 1-8 range in spine shapes,

950 Bins 9-23 are shaft shapes and Bins 24-29 are soma shapes.

951

952

953

954

955

956

957

958

959

960

961

962

963

964

965

966

967

968

969

970

971

972

973

974

975

976

977

978

979 **Extended Data Figure 3**

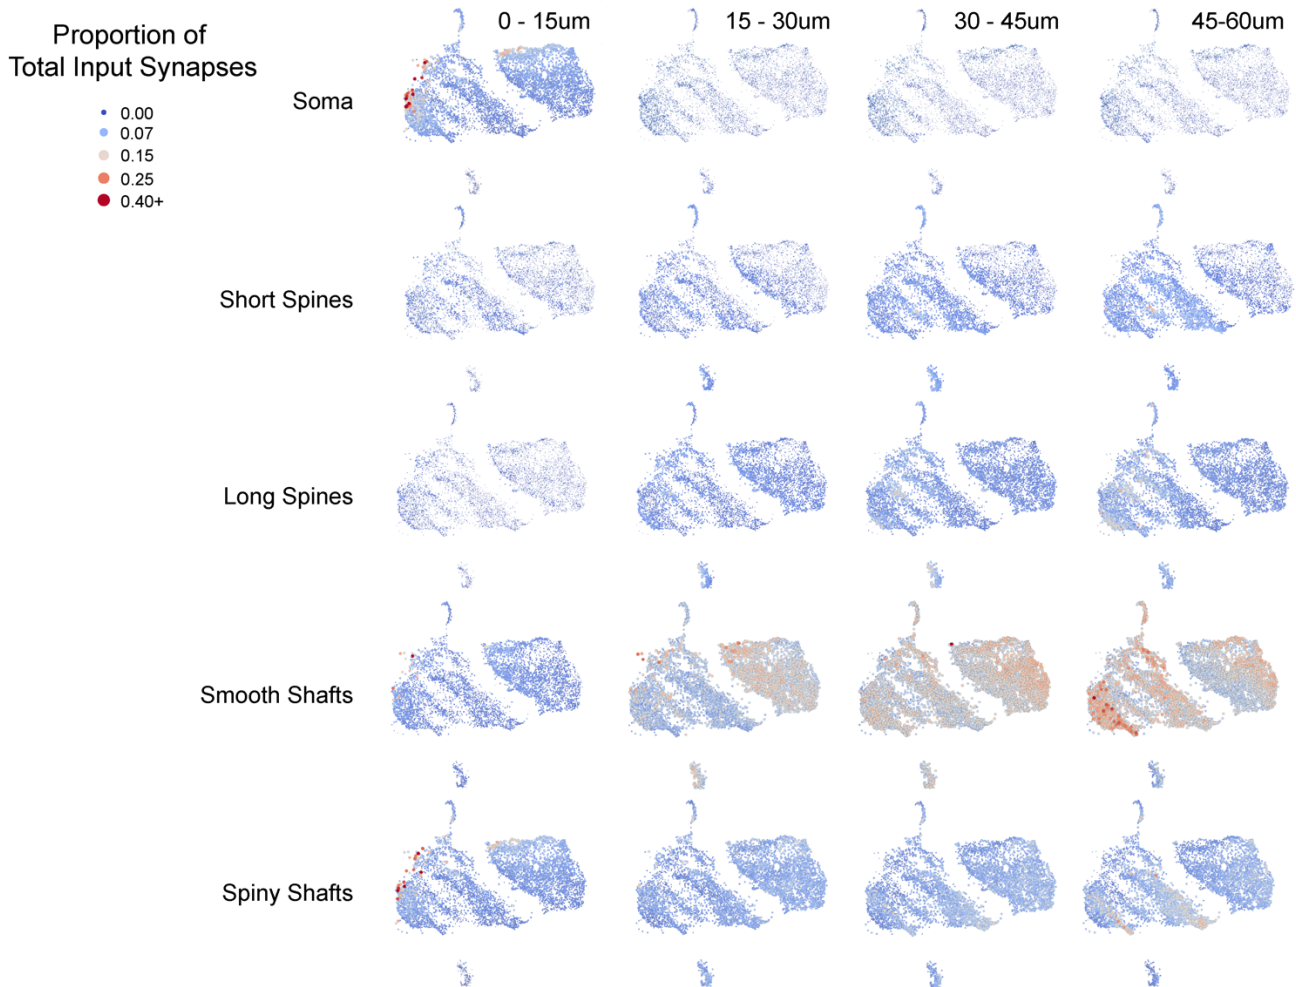

980

981 **Extended Data Figure 3: Inhibitory neuron subclasses exhibit spatial patterns to PSS distributions.** The UMAP  
982 embedding of all the perisomatic features, including PSS features, across all inhibitory cells, colored with respect to what  
983 fraction of that cell's input (within the 60µm cutout) comes from what PSS/distance bin. PSS shape bins were simplified  
984 from 29 bins to 5 broad categories to simplify the visualization (bins 0-4: short spines, 5-8: long-spines, 9-18+23: smooth  
985 shafts, 19-22: spiny shafts, 24-29: soma). This visualization gives insight into how different cells in different parts of this  
986 embedding space receive varying amounts of input onto different shapes within different spatial zones of the perisomatic  
987 area. Cells on the far left hand side of the embedding, where in general bipolar type neurons were found, have larger  
988 fractions of their inputs near the soma, including dendritic shafts which are more irregular in shape (“spiny shafts”), and  
989 smooth shaft inputs farther away where the dendrites begin to elaborate. Basket cells on the right hand side of the side of  
990 the embedding are dominated by somatic inputs and smooth shaft inputs which are more evenly distributed spatially. The  
991 island at the bottom that is dominated by neurogliaform cells is characterized by having relatively fewer somatic inputs,  
992 but an increasing amount of shaft and spiny input at distal dendrites.

993

994

995

996

997

998

999

1000  
1001  
1002  
1003

### Extended Data Figure 4

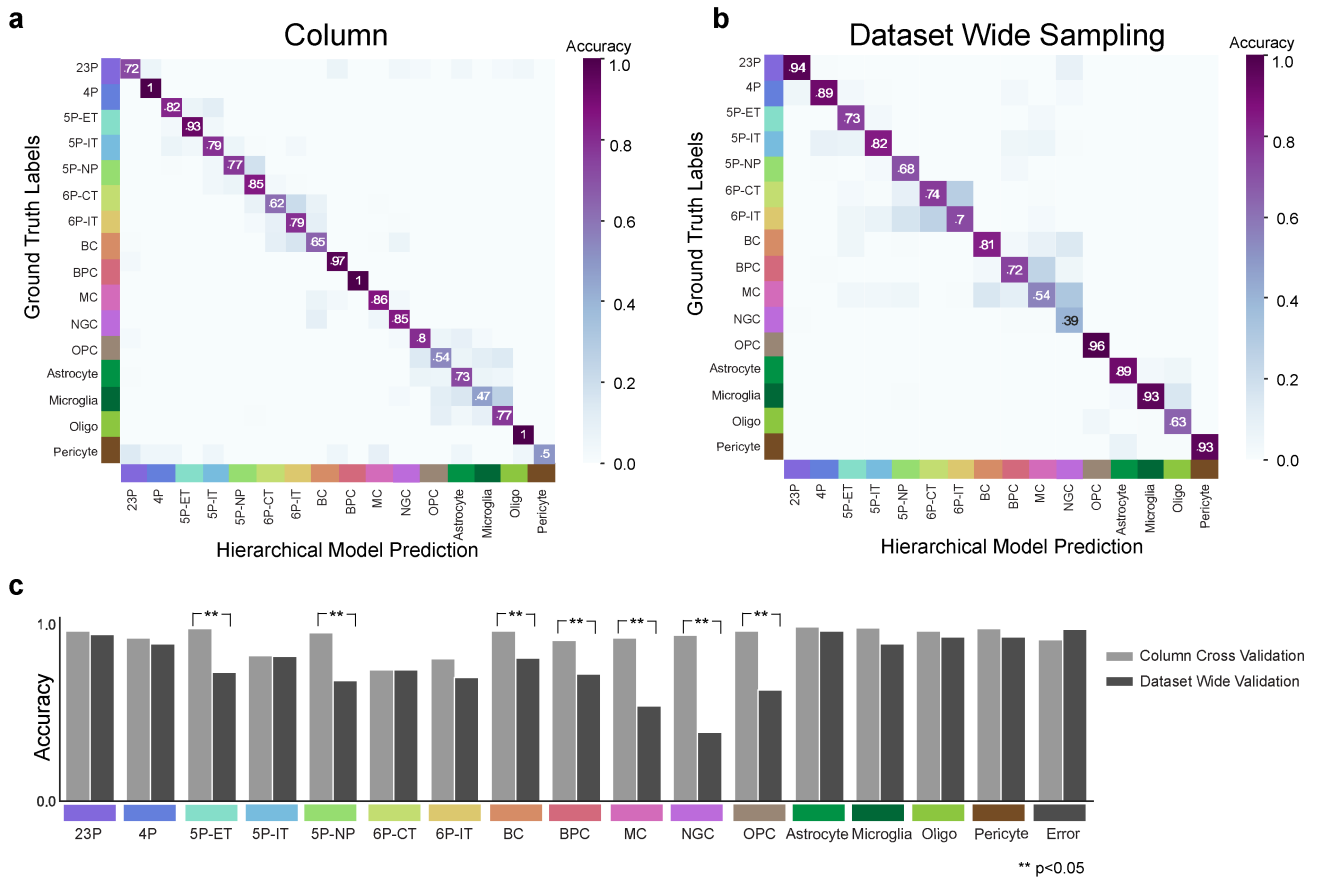

1004  
1005  
1006  
1007  
1008  
1009  
1010  
1011

**Extended Data Figure 4: Classifier validation: a)** Confusion matrix of hierarchical model performance for all cells within the manually labeled column after training. **b)** Confusion matrix of hierarchical model performance on a dataset wide sample of 100 cell predictions from each subclass. **c)** Comparison of column cross validation vs. dataset wide model performance, asterisk notes significance by Fisher Exact Test.

1012 **Extended Data Figure 5**

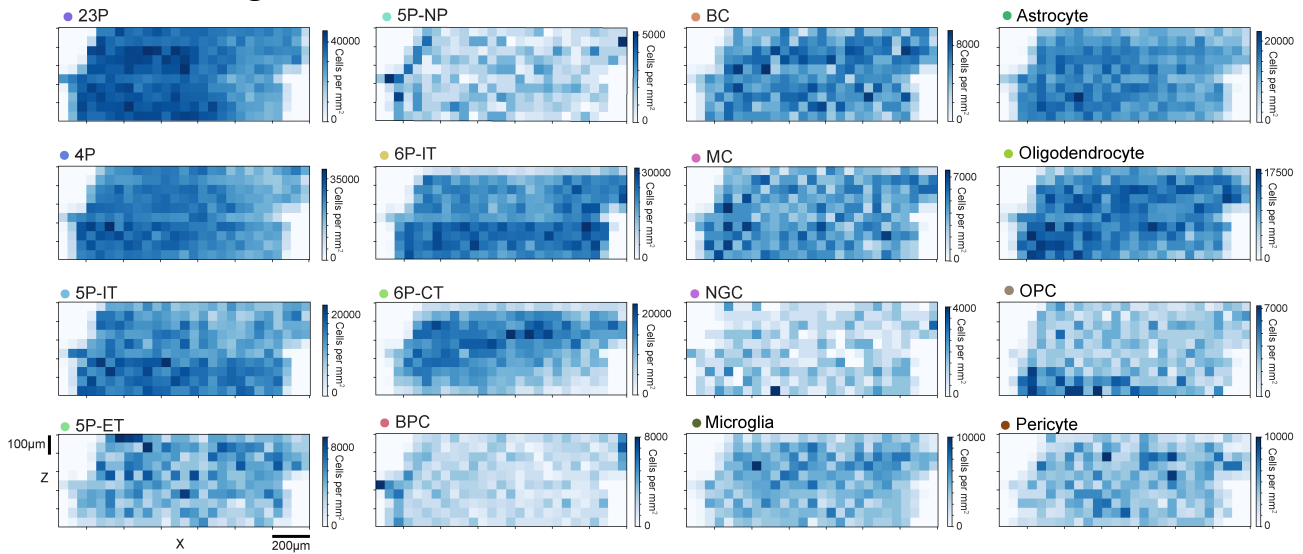

1013

1014

1015

1016

1017

1018

1019

1020

1021

1022

1023

1024

1025

1026

1027

1028

1029

1030

1031

1032

1033

1034

1035

1036

1037

1038

1039

1040

1041

1042

1043

1044

1045

**Extended Data Figure 5: Cell densities across the dataset by cellular subclass.** Predicted cell densities per  $\text{mm}^2$  for each subclass across the entire dataset in the XZ plane. Each square represents  $50 \mu\text{m}^2$  and color denotes the density scaled per  $\text{mm}^2$ . Note due to the approximate 1 mm depth of cortex, these values are also roughly densities per  $\text{mm}^3$ . They roughly agree with densities of cells estimated from light microscopy stereology of subclasses,<sup>29</sup> usually utilizing histochemical markers or genetic tools. Unfortunately for some subclasses, there is not a 1-1 to alignment between the definitions of types in this study and the usual molecular markers used in those studies, as molecular markers are not directly measurable in this electron microscopy volume.

1046 **Extended Data Figure 6**

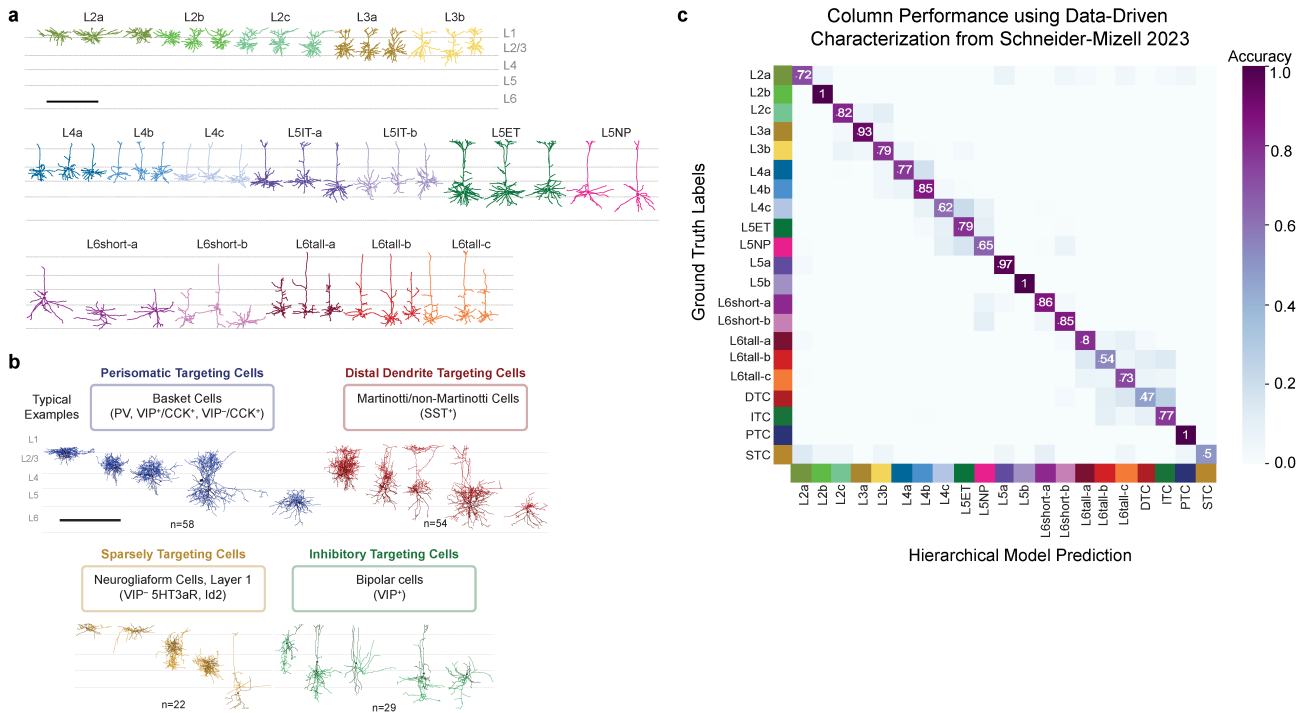

1047  
 1048 **Extended Data Figure 6: Perisomatic feature based classification utilized with different cell-type labels.**  
 1049 Alternative excitatory subclass labels in the column from Schneider-Mizell et al 2023, based on unsupervised clustering  
 1050 of dendritic and synaptic features rather than manual human expert calls. Labels on the clusters were inferred based on the  
 1051 overlap with expert labels and cortical depth, with finer distinctions added when necessary (i.e. L4a,L4b,L4c). **b)**  
 1052 Alternative inhibitory subclass labels from Schneider-Mizell et al. 2023 in the column based on unsupervised clustering  
 1053 of their output connectivity statistics. These subclasses (Perisomatic targeting, Distal Targeting, Sparsely Targeting and  
 1054 Inhibitory Targeting) likely largely but not completely align with broad molecular distinctions made amongst inhibitory  
 1055 cells, based on reviews of the literature where molecular and output connectivity has been measured in the same cells. **c)**  
 1056 A confusion matrix of a hierarchical model retrained to utilize these subclass labels for excitatory neurons vs inhibitory  
 1057 neurons rather than human expert labels. Cross validation performance on the excitatory (67%) and inhibitory (85%)  
 1058 subclass models was lower than the expert labels, due primarily to the fine grained distinctions made amongst layer 4 and  
 1059 6 types. The confusion matrix shown here is the output of the final model trained on all samples from the column.

1060  
 1061  
 1062  
 1063  
 1064  
 1065  
 1066  
 1067  
 1068  
 1069  
 1070  
 1071  
 1072  
 1073  
 1074  
 1075  
 1076  
 1077  
 1078



1079 **Extended Data Figure 7**

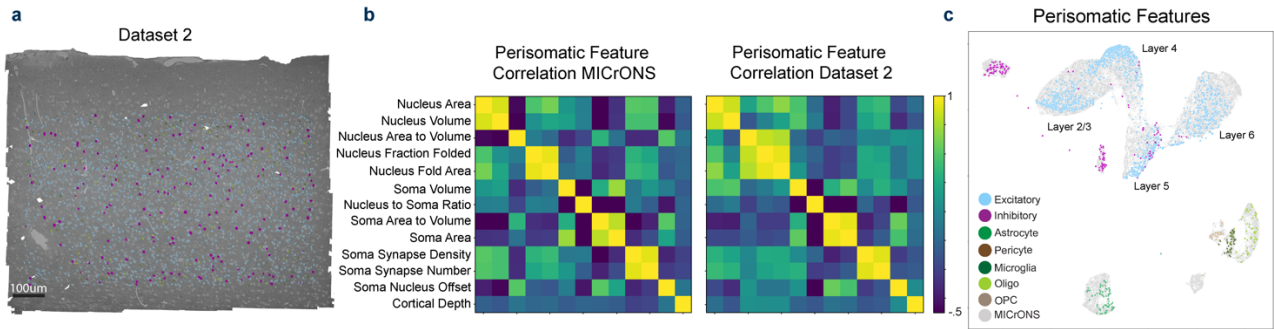

1080  
1081 **Extended Data Figure 7: Basic perisomatic feature patterns maintained across a second dataset from a different**  
1082 **animal. a)** A cutout of a second dataset, which covers layer 2/3 to 6 of cortex, but is only 50 $\mu$ m thick. Somas contained  
1083 within this volume (n=1,944) were analyzed in a manner identical to the larger dataset and soma, nucleus and PSS features  
1084 were extracted. Excitatory nuclei highlighted in light blue and inhibitory nuclei in magenta. **b)** Analysis of the feature to  
1085 feature correlations shows similar correlation structure between the two datasets. **c)** A joint UMAP of the perisomatic  
1086 features with the MICrONS dataset data shown in gray, and the smaller dataset covered by manually identified cell classes  
1087 overlaid. In general, the same overall patterns and degree of separation amongst layers and cell classes was observed. Note:  
1088 pericytes were manually excluded from this dataset due to the lower quality of nucleus and somatic segmentations.  
1089 Extensive detailed subclass cell type validation is not possible in this dataset due to the truncation of axons and dendrites.  
1090  
1091  
1092  
1093
